# Supplementary material for: A CD138+ tumor-associated macrophage/Siglec-F+ neutrophil feed-forward loop promotes immune evasion in pancreatic cancer
Source: JCI journal article supplement (doi:10.1172/jci199516), 2026-03-12
Supplement: sd1 [file 1]

# Supplemental Material

Manuscript

## **A CD138<sup>+</sup> tumor-associated macrophage-Siglec-F<sup>+</sup> neutrophil feedforward loop promotes immune evasion in pancreatic cancer**

(Wang et al.)

### **Supplemental Methods**

#### **Cell lines**

The KPC cell line was generously provided by Prof. Raghu Kalluri from the MD Anderson Cancer Center in Houston, Texas, USA. This cell line was derived from spontaneous tumors in the *Kras*<sup>LSL-G12D</sup>; *Trp53*<sup>LSL-R172H</sup>; *Pdx-1-cre* mouse model. KPC cells were cultured in RPMI 1640 medium supplemented with 10% FBS and 1% penicillin/streptomycin. Prior to the experiments, the cells were routinely evaluated for mycoplasma contamination.

#### **Sorting of CD138<sup>+</sup> TAMs and Siglec-F<sup>+</sup>(SIGLEC-8<sup>+</sup>) neutrophils**

The digestion buffer was prepared in DMEM medium supplemented with 2% FBS, 0.6 mg/mL collagenase IV (Sigma), and 0.01 mg/mL DNase I (Sigma). Tumor tissues were minced in a 10cm Petri dish, resuspended in 5mL of digestion buffer, and incubated on

23 a shaker at 37°C for 30 minutes. The digested tissues were filtered through a 70µm  
24 mesh filter and further separated using 36% Percoll to obtain single-cell suspensions.  
25 These cells were then resuspended in PBS and pre-incubated with anti-mouse  
26 CD16/CD32 Fc Block (BD Biosciences) for 10 minutes at 4°C, followed by incubation  
27 with antibodies against CD14 (Cat 562692), F4/80 (Cat 565410), CD138 (Cat 550805  
28 for human and Cat 564511 for mouse), CD66B (Cat 555724), Ly6g (Cat 560599),  
29 Siglec-F (Cat 562681), and SIGLEC-8 (Cat 347105) for 30 minutes at 4°C. All  
30 antibodies were procured from BD Biosciences, except for SIGLEC-8, which was  
31 purchased from BioLegend. Subsequently, the samples were sorted using a MoFlo  
32 Astrios EQ Cell Sorter (Beckman Coulter, USA).

33

#### 34 **Flow cytometry analysis**

35 Cells from different experiments were stained with fluorescence-labeled antibody  
36 cocktails for 30 minutes at 4°C and subsequently analyzed using a BD LSRFortessa  
37 instrument. For intracellular factor staining, the cells were incubated with Brefeldin A  
38 Solution (BioLegend) for 4 hours. Following this, the cells were fixed and  
39 permeabilized using a Fixation/Permeabilization Kit (BD Biosciences). The data were  
40 analyzed using FlowJo software.

41

#### 42 **Generation of CD45.1/CD45.2 chimeric mice with orthotopic KPC tumors**

43 Eight-week-old *C57BL/6* (CD45.2) mice were lethally irradiated with two doses of 6.5  
44 Gy, followed by reconstitution with  $1 \times 10^6$  donor bone marrow cells from *C57BL/6*-

45 *Ly5.1* (CD45.1) mice. After reconstitution, all mice received prophylactic antibiotics in  
46 their drinking water and were housed in a specific pathogen-free environment. A week  
47 post-reconstitution,  $5 \times 10^5$  KPC cells were injected into the pancreas of the  
48 CD45.1/CD45.2 chimeric mice. At 21 days post-injection, all mice were sacrificed, and  
49 tumor tissues were collected for flow cytometric analysis.

50

### 51 **Adoptive transfer assay**

52 CD138<sup>+</sup> and CD138<sup>-</sup> TAMs were isolated from primary tumors of CD45.1<sup>+</sup> mice with  
53 orthotopic KPC tumors, following established protocols. CD45.2<sup>+</sup> mice received an  
54 intravenous injection of  $5 \times 10^5$  CD138<sup>+</sup> TAMs starting on Day 10 post-orthotopic  
55 injection of KPC cells, with injections repeated every 3-4 days for a total of three doses.  
56 Control groups received intravenous injections of either  $5 \times 10^5$  CD138<sup>-</sup> TAMs or an  
57 equivalent volume of PBS, adhering to the same dosing regimen. At 21 days post-  
58 injection, all mice were euthanized, except for those designated for survival analysis.  
59 The endpoint of the survival analysis was defined as the time at which all mice in the  
60 experimental group had succumbed. Tumor tissues were collected for flow cytometry  
61 analysis, immunohistochemical staining and scRNA-seq.

62

### 63 **Generation of a KPC/*Sdc1*-cKO chimeric mouse model**

64 Eight-week-old spontaneous KPC mice were subjected to lethal irradiation, receiving  
65 two doses of 6.5 Gy, and subsequently reconstituted with  $1 \times 10^6$  donor bone marrow  
66 cells derived from *Sdc1*-cKO mice. Following reconstitution, all mice were

67 administered prophylactic antibiotics via their drinking water and maintained in a  
68 specific pathogen-free environment. Eight weeks post-reconstitution, the mice were  
69 euthanized, and pancreatic tissues were harvested for the evaluation of tumorigenesis.

70

#### 71 **In vitro differentiation of CD138<sup>+</sup> macrophages**

72 Bone marrow cells from male C57BL/6 mice aged 6 to 8 weeks were collected by  
73 crushing the femurs and tibias in 10mL of sterile PBS, followed by filtration through a  
74 70 $\mu$ m mesh filter. Red blood cells were removed using ACK Lysis Buffer (BD  
75 Biosciences). For the differentiation of BMDMs, cells were counted and seeded in  
76 DMEM medium supplemented with 10% FBS, 2% antibiotics, and 20ng/mL M-CSF  
77 (Selleck). Three days post-seeding, half of the culture medium was replaced. On day 5,  
78 fresh medium was added to the cells. At day 7 after plating, cells were stimulated with  
79 250ng/mL IL-34 and/or 1 $\mu$ M PGE<sub>2</sub>. After 24 hours, the cells were harvested and  
80 analyzed by flow cytometry and RT-PCR. For stimulation with conditioned medium  
81 (CM), Siglec-F<sup>+</sup> or Siglec-F<sup>-</sup> neutrophils sorted from tumor tissues of mice with  
82 orthotopic KPC tumors were cultured in DMEM medium supplemented with 10% FBS  
83 and 2% antibiotics for 24 hours. CM was collected and centrifuged for 5 minutes at  
84 200g to remove cellular debris. In rescue experiments, 10 $\mu$ M SC-51089 (EP1  
85 antagonist), 10 $\mu$ M PF-04418948 (EP2 antagonist), 10 $\mu$ M L-798106 (EP3 antagonist),  
86 10 $\mu$ M GW627368X (EP4 antagonist), 10 $\mu$ M ESI-08 (EPAC/Rap1 pathway antagonist),  
87 10 $\mu$ M PI3K/AKT-IN-1 (PI3K-Akt pathway inhibitor), 10 $\mu$ M JSH-23 (NF-kappa B  
88 pathway inhibitor), and 1 $\mu$ M synstatin (a selective inhibitor of syndecan-1) were

89 utilized. All reagents were purchased from MedChemExpress. BMDMs derived from  
90 Sdc1-cKO mice were used to evaluate the roles of syndecan-1 in the differentiation of  
91 CD138<sup>+</sup> TAMs.

92

93 **In vitro differentiation of Siglec-F<sup>+</sup> (SIGLEC-8<sup>+</sup>) neutrophils**

94 Bone marrow-derived neutrophils (BMDNs) were isolated using a Ly6g<sup>+</sup> neutrophil  
95 isolation kit (Miltenyi Biotec). The cells were subsequently stimulated with 100ng/ml  
96 CXCL1 and/or 200ng/ml SAA3 for 24 hours and analyzed via flow cytometry. In rescue  
97 experiments, 10μM WRW4 (FPR2 antagonist) and 40μM p38 MAPK-IN-1 (p38  
98 MAPK pathway inhibitor) were utilized. All reagents were procured from  
99 MedChemExpress. For stimulation with CM, CD138<sup>+</sup> or CD138<sup>-</sup> TAMs sorted from the  
100 tumor tissues of mice with orthotopic KPC tumors were cultured in DMEM medium  
101 supplemented with 10% FBS and 2% antibiotics for 24 hours. The CM was  
102 subsequently collected and centrifuged for 5 minutes at 200g to remove cellular debris.  
103 Following this, BMDNs were cultured in the presence of the CM for 24 hours and  
104 analyzed using flow cytometry. In rescue experiments, 10μg/ml anti-SAA3 antibody  
105 (Cat A11948, ABclonal Biotechnology) was introduced in the BMDN culture system.  
106 For the in vitro polarization of SIGLEC-8<sup>+</sup> neutrophils, PBDNs were isolated from  
107 healthy donors using a MACSxpress<sup>®</sup> whole blood neutrophil isolation kit (Miltenyi  
108 Biotec). CD138<sup>+</sup> and CD138<sup>-</sup> TAMs sorted from patients with PDAC were cultured in  
109 DMEM medium supplemented with 10% FBS and 2% antibiotics for 24 hours. The  
110 CM was subsequently collected and centrifuged at 200g for 5 minutes to remove

111 cellular debris. Following this, PBDNs were cultured in the presence of the CM for 24  
112 hours and analyzed using flow cytometry.

113

#### 114 **Lentivirus production and transfection**

115 The pLV3-U6-II34-sgRNA1/2/3-Cas9-EGFP-Puro and pSLenti-EF1-EGFP-CMV-  
116 OVAL-3xFLAG-WPRE plasmids were co-transfected into HEK-293T cells alongside  
117 the packaging plasmid psPAX2 and the envelope plasmid pMD2G, utilizing the PEI  
118 transfection reagent (Beyotime). Virus particles were collected 48 hours post co-  
119 transfection and subsequently employed to infect KPC cells. The cells were harvested  
120 three days following injection for Western blot validation, in vitro cultures, and  
121 orthotopic implantation.

122

#### 123 **Western blot analysis**

124 Bone marrow cells from Ptger2-cKO and control mice, as well as KPC cells infected  
125 with lentivirus, were lysed using RIPA lysis buffer (Beyotime) supplemented with a  
126 protease and phosphatase inhibitor cocktail (Beyotime) and phenylmethanesulfonyl  
127 fluoride (PMSF, Beyotime) at 4°C for one hour. The protein concentration was  
128 quantified using a BCA Protein Assay Reagent (Beyotime). The proteins were  
129 subsequently separated by 10% SDS-PAGE and transferred to a polyvinylidene fluoride  
130 membrane (PVDF, Millipore). Following the blocking of the membrane with 5% nonfat  
131 dry milk, it was incubated overnight with a primary antibody against PTGER2 (Cat  
132 ab167171, Abcam) or IL-34 (Cat PA5-95624, Thermofisher), followed by a one-hour

133 incubation with a horseradish peroxidase (HRP)-conjugated anti-rabbit secondary  
134 antibody (Cat A0208, Beyotime). Finally, the membrane was exposed using a Super-  
135 sensitive ECL chemiluminescent substrate (Biosharp) and a ChemiScope Touch  
136 machine (Clinx) to detect immunoreactive bands.

137

### 138 **ELISA**

139 Serum samples were collected from PDAC patients in Cohort 1, healthy donors, control  
140 mice, and orthotopic KPC mice. Additionally, CM derived from tumor-infiltrating  
141 Siglec-F<sup>+</sup> and Siglec-F<sup>-</sup> neutrophils were also obtained. The levels of PGE<sub>2</sub> in these  
142 samples were measured using an ELISA kit (R&D Systems) in accordance with the  
143 manufacturer's instructions.

144

### 145 **Morphology, phagocytosis, and migration of CD138<sup>+</sup> macrophages**

146 Macrophages, including sorted CD138<sup>+</sup> and CD138<sup>-</sup> TAMs, as well as in-vitro  
147 differentiated CD138<sup>+</sup> and CD138<sup>-</sup> macrophages, were seeded onto cell slides  
148 (ThermoFisher) at a density of 1X10<sup>5</sup> per slide and cultured in DMEM medium  
149 supplemented with 10% FBS and 2% antibiotics. After 24 hours of culture, the cells  
150 were fixed with 4% paraformaldehyde for 30 minutes and subsequently stained with  
151 Alexa Fluor<sup>TM</sup> 647 phalloidin (ThermoFisher) for 60 minutes at room temperature. The  
152 morphology of these cells was observed using a confocal laser scanning microscope  
153 (TCS SP8 CARS, Leica).

154 To investigate the phagocytic activity of macrophages, the cells were seeded in 96-well

155 plates at a concentration of  $1 \times 10^5$  cells per well. pHrodo™ Deep Red E.coli  
156 BioParticles™ conjugates (ThermoFisher) were added to the cells, followed by a 2-  
157 hour incubation at 37°C. The phagocytic activity was assessed using a Multi-Mode  
158 Microplate Reader (SpectraMax i3x, Molecular Devices) at a wavelength of  
159 640/655nm.

160 To examine the migration of macrophages, a transwell assay was conducted. The cells  
161 were placed in the upper chambers of a transwell apparatus with 8µm pore sizes  
162 (Corning) using DMEM medium containing 0.5% FBS and 2% antibiotics. The lower  
163 chambers contained DMEM medium supplemented with 10% FBS and 2% antibiotics.  
164 After 18 hours, the cells that migrated through the membrane were stained with a 0.5%  
165 crystal violet solution (Beyotime) and quantified by counting the average number of  
166 cells in five high-power fields (HPF) per well.

167

#### 168 **Transwell assay of BMDNs**

169 BMDNs were isolated and seeded in the upper chambers of a transwell apparatus with  
170 3µm pore sizes (Corning) at a density of  $1 \times 10^6$  cells per well. The lower chambers  
171 contained CM from CD138<sup>+</sup> or CD138<sup>-</sup> TAMs diluted at a 1:1 ratio with DMEM  
172 medium supplemented with 10% FBS and 2% antibiotics. After 2 hours of culture, the  
173 cells in the lower chambers were counted.

174 To assess the chemotaxis of proteins secreted by CD138<sup>+</sup> TAMs, DMEM medium  
175 containing 10ng/ml CXCL1 and/or 100ng/ml SAA3 was added to the lower chamber  
176 of the transwell apparatus.

177

178 **OT1 CD8<sup>+</sup> T cell culture assay**

179 Splenocytes were harvested from OT1 mice and incubated with the OVA peptide (OVA  
180 257-264, MedChemExpress) in RPMI 1640 medium for one hour at 37°C.  
181 Subsequently, 1X10<sup>6</sup> splenocytes were seeded in 12-well plates and co-cultured with  
182 either 2X10<sup>5</sup> CD138<sup>+</sup> or CD138<sup>-</sup> TAMs, or an equal number of Siglec-F<sup>+</sup> or Siglec-F<sup>-</sup>  
183 neutrophils isolated from orthotopic tumors, in RPMI 1640 medium supplemented with  
184 10% FBS, 2% antibiotics, and 20ng/ml mouse recombinant IL-2 (MedChemExpress)  
185 for 24 hours. Non-adherent cells were then collected to measure IFN $\gamma$  production in  
186 CD8<sup>+</sup> T cells.

187 In the case of Siglec-F<sup>+</sup> neutrophils differentiated from BMDNs, BMDNs were induced  
188 in vitro using CXCL1 and/or SAA3 or CM derived from CD138<sup>+</sup> or CD138<sup>-</sup> TAMs,  
189 following established protocols. These cells were then co-cultured with an equal  
190 number of OVA peptide-stimulated OT1 splenocytes for 24 hours.

191 To evaluate the functional impairment of CD8<sup>+</sup> T cells, a co-culture system was  
192 established using OT1 splenocytes in the presence or absence of CD138<sup>+</sup> TAMs and/or  
193 Siglec-F<sup>+</sup> neutrophils. Briefly, OT1 splenocytes were labeled with the CellTrace™  
194 Violet Cell Proliferation Kit (ThermoFisher) according to the manufacturer's  
195 instructions and subsequently incubated with the OVA peptide. Following this, 1X10<sup>6</sup>  
196 OT1 splenocytes were seeded in 12-well plates and co-cultured with 2X10<sup>5</sup> CD138<sup>+</sup>  
197 TAMs and/or an equal number of Siglec-F<sup>+</sup> neutrophils isolated from orthotopic tumors.  
198 The co-culture was maintained in RPMI 1640 medium containing 10% FBS, 2%

199 antibiotics, and 20ng/ml mouse recombinant IL-2 for a duration of 48 hours. Non-  
200 adherent cells were then collected for flow cytometric analysis.

201

### 202 **Target cell killing assay**

203 To establish co-cultures of OT1 CD8<sup>+</sup> T cells, KPC-OVA cells, and CD138<sup>+</sup> TAMs  
204 and/or Siglec-F<sup>+</sup> neutrophils, OT1 splenocytes were harvested from OT1 mice and  
205 incubated with the OVA peptide for five days at 37°C. Subsequently, OT1 CD8<sup>+</sup> T cells  
206 were purified using the EasySep™ mouse CD8<sup>+</sup> T cell isolation kit (Stemcell  
207 Technologies). KPC-OVA cells were seeded and allowed to adhere overnight.  
208 Following this, OT1 CD8<sup>+</sup> T cells were introduced into the culture, either in the  
209 presence or absence of CD138<sup>+</sup> TAMs and/or Siglec-F<sup>+</sup> neutrophils derived from  
210 orthotopic tumors. After 48 hours of co-culture, the cells were harvested via  
211 trypsinization and analyzed using flow cytometry.

212

### 213 **Human CD8<sup>+</sup> T cell culture assay**

214 Human CD8<sup>+</sup> T cells were isolated from the peripheral blood of healthy donors using a  
215 CD8<sup>+</sup> T cell isolation kit (Miltenyi Biotec). Subsequently, 1X10<sup>5</sup> cells were seeded into  
216 each well of 48-well plates alongside an equal number of SIGLEC-8<sup>+</sup> or SIGLEC-8<sup>-</sup>  
217 neutrophils isolated from the tumor tissues of patients with PDAC. These cells were  
218 cultured in RPMI 1640 medium supplemented with 10% FBS, 2% antibiotics, 20ng/ml  
219 human recombinant IL-2 (MedChemExpress), and 1% Dynabeads™ Human T-  
220 Activator CD3/CD28 (ThermoFisher) for 24 hours. Following this incubation period,

221 the cells were collected for flow cytometry analysis.

222

### 223 **RT-PCR**

224 RNA was extracted using the RNeasy Mini Kit (Qiagen), and cDNAs synthesis was  
225 performed with the HiScript II Reverse Transcriptase Kit (Vazyme). Gene expression  
226 was quantified using RT-PCR with SYBR Green Master Mix (Vazyme). The primer  
227 sequences used for RT-PCR are as follows: *Ptger1* (EP1): Forward Primer,  
228 GGGCTTAACCTGAGCCTAGC; Reverse Primer, GTGATGTGCCATTATCGCCTG;  
229 *Ptger2* (EP2): Forward Primer, GGAGGACTGCAAGAGTCGTC; Reverse Primer,  
230 GCGATGAGATTCCCCAGAACC; *Ptger3* (EP3): Forward Primer,  
231 CCGGAGCACTCTGCTGAAG; Reverse Primer, CCCCACTAAGTCGGTGAGC;  
232 *Ptger4* (EP4): Forward Primer, ACCATTCCTAGATCGAACCGT; Reverse Primer,  
233 CACCACCCCGAAGATGAACAT; *Ptgs2* (COX2): Forward Primer,  
234 TTCAACACACTCTATCACTGGC; Reverse Primer,  
235 AGAAGCGTTTGCGGTACTCAT.

236

### 237 **Immunohistochemistry, Immunofluorescence, and mIHC**

238 Paraffin-embedded samples were sectioned to a thickness of 4 $\mu$ m. Antigen retrieval was  
239 performed in a pressure cooker using 0.01M citrate buffer (pH 6.0) for 30 minutes. For  
240 immunohistochemistry, specimens were treated with 3% H<sub>2</sub>O<sub>2</sub> for 30 minutes, blocked  
241 with 5% BSA (Sigma) for 1 hour, and incubated overnight at 4°C with primary  
242 antibodies against Ki67 (Cat ab16667, Abcam) and cleaved caspase-3 (Cat MAB835,

243 R&D systems). Subsequently, the slides were incubated with anti-rabbit IgG, HRP-  
244 linked antibody (Cat A0208, Beyotime) for 1 hour, followed by immunodetection using  
245 DAB (ZSGB-BIO) according to the manufacturer's instructions. Imaging was  
246 performed using a light microscope (Leica DM2500), and data analysis was conducted  
247 with ImageJ software (National Institutes of Health).

248 For immunofluorescence, slides were blocked with 5% BSA for 1 hour, then incubated  
249 overnight at 4°C with anti-F4/80 (Cat 70076S, Cell Signaling Technology) and anti-  
250 CD138 (Cat ab181789, Abcam) antibodies. The specimens were labeled with Alexa  
251 Fluor 488 (Cat A0423, Beyotime) or Alexa Fluor 647 (Cat A0473, Beyotime) and  
252 visualized with a confocal laser scanning microscope (Leica TCS SP8).

253 The mIHC staining was conducted using an Opal Polaris 7-Color IHC Kit (Akoya  
254 Biosciences) following the provided instructions. Briefly, specimens were retrieved in  
255 AR6 buffer for 30 minutes, followed by a blocking step of one-hour, and subsequent  
256 incubation with primary antibodies, Opal Polymer HRP Ms+Rb, and Opal work  
257 solution in sequence. This process was repeated until all antigens were labeled. The  
258 slides were then scanned using an automated imaging system (PhenoImager™ HT,  
259 Akoya Biosciences). The three staining panels contained the following antibodies:  
260 Panel 1, CD3 (Cat ab16669, Abcam), CD8 (Cat 70306S, Cell Signaling Technology),  
261 CD56 (Cat 3576S, Cell Signaling Technology), FOXP3 (Cat BX50188, Biolyntx), PD-  
262 1 (Cat 86163T, Cell Signaling Technology), and Granzyme B (GZMB, Cat 46890T,  
263 Cell Signaling Technology); Panel 2, PAN-CK (Cat ab7753, Abcam), CD68 (Cat  
264 ab201340, Abcam), CD66B (Cat ab300122, Abcam), CD11C (Cat 45581T, Cell

265 Signaling Technology), CD20 (Cat ab78237, Abcam), and CD138 (Cat ab128936,  
266 Abcam); Panel 3, CD68 (Cat ab201340, Abcam), CD66B (Cat ab300122, Abcam),  
267 CD138 (Cat ab128936, Abcam), and SIGLEC-8 (Cat ab305297, Abcam). Cell types  
268 were defined as follows: T cells (CD3<sup>+</sup>CD56<sup>-</sup>), CD8<sup>+</sup> T cells (CD3<sup>+</sup>CD8<sup>+</sup>CD56<sup>-</sup>), NK  
269 cells (CD3<sup>-</sup>CD56<sup>+</sup>), macrophages (CD68<sup>+</sup>), neutrophils (CD66B<sup>+</sup>), dendritic cells  
270 (CD11C<sup>+</sup>CD68<sup>-</sup>CD66B<sup>-</sup>Pan-CK<sup>-</sup>CD20<sup>-</sup>), B cells (CD20<sup>+</sup>), plasma cells (CD138<sup>+</sup>CD68<sup>-</sup>  
271 CD66B<sup>-</sup>CD11C<sup>-</sup>Pan-CK<sup>-</sup>CD20<sup>-</sup>), activated cytotoxic CD8<sup>+</sup> T cells (CD3<sup>+</sup>CD8<sup>+</sup>CD56<sup>-</sup>  
272 GZMB<sup>+</sup>), exhausted CD8<sup>+</sup> T cells (CD3<sup>+</sup>CD8<sup>+</sup>CD56<sup>-</sup>PD-1<sup>+</sup>), and Treg cells (CD3<sup>+</sup>CD8<sup>-</sup>  
273 CD56<sup>-</sup>Foxp3<sup>+</sup>).

274

#### 275 **Neutrophil extracellular trap (NET) formation assay**

276 Neutrophils, classified as either Siglec-F<sup>+</sup> or Siglec-F<sup>-</sup>, were isolated from the tumor  
277 tissues of orthotopic KPC mice and seeded at a density of 1X10<sup>5</sup> cells per well in a 24-  
278 well plate containing RPMI 1640 medium supplemented with 10% FBS and 1%  
279 penicillin/streptomycin. After a 24-hour culture, 200 nM SYTOX Green (Thermofisher)  
280 in HBSS was carefully added to each well to avoid disturbing the formation of NETs.  
281 Following a 15-minute incubation, the plate was imaged using a confocal laser scanning  
282 microscope (Leica TCS SP8). Five fields of view at 10× magnification were captured  
283 for each well. The analysis was performed using ImageJ software, and NET extension  
284 was quantified as the percentage of the total area occupied by the SYTOX Green-  
285 positive region.

286

287 **Single cell sample preparation**

288 Minced tissues (2-4 mm<sup>3</sup>) were digested for 30 minutes at 37 °C in an enzymatic  
289 solution containing collagenase type IV and DNase I (Sigma). The single-cell  
290 suspensions were filtered through 70-µm and 30-µm cell strainers (Miltenyi Biotech)  
291 and treated with Red Blood Cell Lysis Solution (Miltenyi Biotech). Cell viability was  
292 assessed using Countstar Rigel (Alit Biotech), and dead cell removal was carried out  
293 depending on the viability using the Dead Cell Removal Kit (Miltenyi Biotech). Finally,  
294 the cells were re-suspended in 1X PBS (Invitrogen) supplemented with 0.04% BSA at  
295 a final concentration of 700-1200 cells/µl, and subsequently processed with the 10X  
296 Chromium Single Cell 3' Kit (v3.1) according to the manufacturer's instructions at  
297 Novogene Bioinformatics Technology Co., Ltd (Tianjin, China).

298

299 **Single-cell RNA sequencing (scRNA-seq)**

300 The cell suspension was loaded into a 10X Chromium Chip (v3.1) and barcoded using  
301 a 10X Chromium Controller. RNA from the barcoded cells was subsequently reverse-  
302 transcribed, amplified, and prepared into sequencing libraries with 10X Library  
303 Construction Kit (v3.1), following the manufacturer's instructions. Sequencing was  
304 conducted with an Illumina NovaSeq, generating 150-bp paired-end reads at Novogene  
305 Bioinformatics Technology Co., Ltd (Tianjin, China).

306

307 **Bulk RNA sequencing**

308 RNA was extracted from Siglec-F<sup>+</sup> and Siglec-F<sup>-</sup> neutrophils isolated from orthotopic

309 tumors or BMDMs exposed to IL-34 and/or PGE<sub>2</sub> using the MolPure Cell/Tissue Total  
310 RNA Kit (Yeasen, China). Prior to analysis, the RNA samples underwent quality  
311 assessment. Following this assessment, mRNA was enriched using magnetic oligo (dT)  
312 beads to construct a sequencing library. Adapter ligation and size selection were  
313 subsequently performed, followed by the amplification of the cDNA library.  
314 Sequencing was conducted on the Novaseq 6000 platform (Illumina, San Diego, CA,  
315 USA).

316

### 317 **Processing of scRNA-seq data**

318 FASTQ files were processed using Cell Ranger (v7.2.0, 10x Genomics) with default  
319 parameters and the mm10 mouse reference genome (version 2020-A, 10x Genomics).  
320 Subsequent analyses were conducted in R (v4.4.1) utilizing Seurat (v5.3.0)(1). A Seurat  
321 object was generated, and the percentage of mitochondrial gene expression was  
322 calculated for quality control purposes. Cells with fewer than 1,000 unique molecular  
323 identifiers (UMI) counts, fewer than 300 expressed genes, or greater than 20%  
324 mitochondrial gene content were excluded from the analysis.

325 Seurat objects derived from sorted F4/80<sup>+</sup> cells were merged. The data were normalized,  
326 and variable features were selected using SCTransform(2, 3). Principal component  
327 analysis (PCA) was performed using RunPCA, retaining the first 100 principal  
328 components. Batch effects were corrected using Harmony(4), which was implemented  
329 via Seurat's integration function, with the corrected embeddings saved as 'harmony'. A  
330 shared nearest neighbor (SNN) graph was constructed using FindNeighbors based on

331 the first 20 harmony dimensions. Clustering was executed using the Louvain algorithm  
332 in FindClusters (resolution=1.0). Cluster-specific marker genes were identified using  
333 FindAllMarkers (only.pos=TRUE, min.pct=0.1, FDR<0.01). Cells expressing  
334 conflicting lineage markers were classified as doublets and subsequently removed.  
335 Clusters were merged based on their top marker genes, and distinctive features were  
336 recalculated using FindAllMarkers with the same parameters. Uniform manifold  
337 approximation and projection (UMAP)(5) was performed using RunUMAP for two-  
338 dimensional visualization.

339 The scRNA-seq data of monocytes derived from the blood of orthotopic KPC mice  
340 were obtained from the GEO database (accession code: GSE217846) and subsequently  
341 merged with Seurat objects from live cells isolated from the tumor tissues of orthotopic  
342 KPC mice. The data were normalized using the NormalizeData function, scaled with  
343 the ScaleData function, and variable features were selected using FindVariableFeatures.  
344 PCA was performed with the RunPCA function, utilizing 100 principal components.  
345 Batch effects were corrected using IntegrateLayers with HarmonyIntegration. A SNN  
346 graph was constructed using FindNeighbors, followed by clustering with FindClusters  
347 (default parameters unless otherwise specified). Finally, UMAP was applied for two-  
348 dimensional visualization using RunUMAP.

349 A public scRNA-seq dataset (accession code: PRJNA978570) concerning healthy  
350 pancreas and acute pancreatitis in mice was retrieved from the European Nucleotide  
351 Archive (ENA) browser (<https://www.ebi.ac.uk/ena/browser/view/PRJNA978570>).

352 The data preprocessing adhered to the protocols outlined previously.

353

#### 354 **Identification of main cell types**

355 After identifying marker genes using the FindAllMarkers function, cells derived from  
356 the blood and tumor tissues of orthotopic KPC mice were categorized into eight main  
357 types: ductal cells (*Krt18*, *Krt8*, *Epcam*, *Cdkn2a*, *Clu*), CAFs (*Colla1*, *Colla2*, *Dcn*,  
358 *Col5a2*, *Bgn*), DCs (*Flt3*, *Grk3*, *Htr7*), mast cells (*Kit*, *Tpsb2*, *Cpa3*, *Hs6st2*, *Mcpt4*),  
359 monocytes/macrophages (Monos/Mphs) (*Cd14*, *Ly6c2*, *Cxc3r1*, *Cd68*, *Adgre1*, *Fcgr1*,  
360 *Clqa*, *Clqb*), neutrophils (*Csf3r*, *S100a9*, *S100a8*, *Acod1*), B cells (*Cd79a*, *Cd19*,  
361 *Cd79b*, *Ms4a1*), and T/NK cells (*Cd3d*, *Cd3e*, *Nkg7*, *Klrd1*, *Cd4*, *Cd8a*). Furthermore,  
362 DCs were subclassified into cDC1 (*H2-Oa*, *H2-Dmb2*) and cDC2 (*Ccr7*, *Fscn1*) based  
363 on their distinct signatures.

364 For the dataset of healthy pancreas and acute pancreatitis in mice, 14 distinct cell types  
365 were identified: acinar cells, early acinar-to-ductal metaplasia (ADM–early), late  
366 acinar-to-ductal metaplasia (ADM–late), ductal cells, endocrine cells, fibroblasts,  
367 endothelial cells, pericytes, erythrocytes, T/NK cells, B cells, DCs, neutrophils, and  
368 Monos/Mphs, as referenced in Aney et al.(6) along with established marker genes.  
369 Subsequently, Monos/Mphs and neutrophils were extracted for further analysis.

370

#### 371 **Identification of monocyte, macrophage, and neutrophil subtypes**

372 The scRNA-seq data of F4/80<sup>+</sup> cells, sorted from tumor tissues of orthotopic KPC mice,  
373 were pre-processed. Following dimension reduction using UMAP and the construction  
374 of mutual nearest neighbors (MNN), F4/80<sup>+</sup> cells were categorized into seven subtypes:

375 MM1/*Sdc1*<sup>+</sup> mphs (*Sdc1, Saa3, Ccl2, Cxcl3, Met*), MM2/*Cxcl9*<sup>+</sup> mphs (*Cxcl9, Slamf8,*  
376 *Serpina3g, Mmp25, Stat1*), MM3/*Plac8*<sup>+</sup> mphs (*Ace, Ly6c2, Plac8, Hp, Sell*),  
377 MM4/*Mki67*<sup>+</sup> mphs (*Pclaf, Top2a, Cdk1, Mki67, Ube2c*), MM5/*Mrc1*<sup>+</sup> mphs (*Stab1,*  
378 *Pdgfc, Itga6, Mrc1, Wwp1*), MM6/*Il1b*<sup>+</sup> mphs (*Il1b, Clec4e, Adora2a, Atp2b4, Tnfsf9*),  
379 and DCs (*Ccl17, H2-Oa, Cd209a, H2-DMb2, Flt3*).

380 For the reclustering of monocytes and macrophages derived from blood and tumor  
381 tissues of orthotopic KPC mice, cells annotated as monocytes and macrophages were  
382 isolated, and pre-processing steps were conducted. After dimension reduction with  
383 UMAP and MNN construction, eight subsets were identified, which included the six  
384 macrophage subtypes mentioned above, along with two additional populations defined  
385 as *ApoE*<sup>+</sup> Mphs (*ApoE, Apol7c, Mmp13*) and *Fgfr2*<sup>+</sup> Mphs (*Fgfr2, Pde4c, Trim69*).

386 Notably, the monocytes and the *Plac8*<sup>+</sup> macrophage subset were merged into *Plac8*<sup>+</sup>  
387 Monos/Mphs due to their similar transcriptional profiles (*Ace, Ly6c2, Plac8, Hp, Sell*).  
388 Cell communication analysis was performed using CellChat (v2.1.0)(7, 8).

389 Neutrophils were classified into four subtypes: MN1 (*Ltc4s, Siglecf, Ptgs1, Cysltr1,*  
390 *Scimp*), MN2 (*Hspa1b, Hspa1a, Hsp90aa1, Inhba, Hsp90aa1*), MN3 (*Ifit3, Ifit1, Gbp5,*  
391 *Lrg1, Rsad2, Gbp2, Irf7*), and MN4 (*S100a8, S100a9, Rps26, Rps12, Rpl23*).

392 Monos/mphs and neutrophils extracted from the dataset concerning healthy pancreas  
393 and acute pancreatitis in mice were mapped to our in-house macrophage and neutrophil  
394 datasets using Seurat. Briefly, anchor identification and label prediction were  
395 performed based on SCT normalization and PCA reduction. The query data were  
396 projected onto the UMAP visualization defined by the reference, and the merged cell

397 embeddings were visualized using the reference-defined UMAP projection.

398

### 399 **Identification of CD8<sup>+</sup> T cell subsets**

400 Tumor-infiltrating CD8<sup>+</sup> T cells were isolated from orthotopic KPC mice that received  
401 adoptive transfers of either CD138<sup>+</sup> or CD138<sup>-</sup> TAMs, as well as from control and Sdc1-  
402 cKO mice bearing orthotopic tumors. These cells were subsequently analyzed using  
403 scRNA-seq. The data underwent preprocessing and analysis in accordance with  
404 established protocols. Seven distinct CD8<sup>+</sup> T cell subsets were identified based on the  
405 expression levels of genes related to T cell proliferation, activation, and exhaustion.  
406 These subsets included naive-like, early-activation, effector-memory (T<sub>EM</sub>), precursor-  
407 exhausted (Tpex), intermediate exhausted (Intermediate Tex), terminally-exhausted  
408 (Tex), and proliferating CD8<sup>+</sup> T cells.

409

### 410 **Cell fate probability calculation**

411 Pseudotime analysis was conducted using Monocle3 (v1.3.4)(9–11). The Seurat object  
412 was converted to an AnnData format utilizing SeuratDisk (v0.0.0.9020) and  
413 subsequently imported into Python (v3.11.7). Transition matrices were generated with  
414 CellRank (v2.0.4)(12) employing PseudotimeKernel (based on Monocle3 pseudotime)  
415 and ConnectivityKernel (based on transcriptomic similarity), which were combined  
416 into a single kernel with weights of 0.8 and 0.2, respectively. Generalized Perron  
417 Cluster Cluster Analysis (GPCCA)(13) was applied to identify macrostates of cellular  
418 dynamics. Terminal states were inferred, and fate probabilities were computed for the

419 lineage leading to *Sdc1*<sup>+</sup> TAMs. Driver genes were identified based on their expression  
420 correlation with fate probabilities toward the *Sdc1*<sup>+</sup> TAM terminal state. The top 10 and  
421 bottom 10 driver genes were selected and visualized in a heatmap using the  
422 ComplexHeatmap package (v2.22.0)(14) in R.

423

#### 424 **Survival analysis based on RNA sequencing data**

425 Specific marker genes for each macrophage and neutrophil subset were identified based  
426 on the criteria of an average log2fold change (FC) greater than 1, an adjusted p value  
427 of less than 0.01, and expression present in over 30% of cells. Mouse gene symbols  
428 were converted to their human orthologs utilizing ENSEMBL v109, excluding  
429 mitochondrial genes from the analysis. Additionally, canonical marker genes were  
430 manually incorporated for each subset, including *CD68*, *CD14*, and *ADGRE1* for  
431 macrophage subsets, as well as *CSF3R* for neutrophil subsets. For the MM4 subset,  
432 only the top 80 most variable marker genes were retained, as its transcriptional profile  
433 contained an excessive number of marker genes meeting the established criteria.  
434 Subsequently, the bulk RNA-seq dataset from patients with PDAC (TCGA-PAAD) was  
435 obtained from the GDC Data Portal (<https://portal.gdc.cancer.gov/projects/TCGA-PAAD>). Gene Set Variation Analysis (GSVA) enrichment scores for the marker genes  
436 of each subset were computed using the GSVA package (v2.0.7)(15) with the  
437 *gsvaParam* method, based on the transcripts per million (TPM)-normalized  
438 transcriptional profile from the TCGA dataset. Patients were stratified into high- and  
439 low-score groups according to the median score of each subset. Kaplan-Meier survival  
440

441 analysis was conducted to estimate overall survival, and the statistical significance of  
442 differences between groups was determined using the log-rank test implemented in the  
443 survminer (v0.5.0) and survival (v3.8.3) R packages. Survival curves, along with risk  
444 tables indicating the number of patients at risk, were generated for visualization.

445

#### 446 **Processing of bulk RNA-seq data**

447 Transcriptome indices were generated utilizing the GRCm39 mouse reference genome  
448 and GENCODE M29 transcript annotations. Sequencing data were quantified with  
449 Salmon (v1.9.0)(16). Read count matrices were imported and aggregated through the  
450 tximport function from the tximport package (v1.30.0) in R (v4.4.1). Differential  
451 expression analysis was performed with DESeq2 (v1.42.0)(17) to conduct pairwise  
452 comparisons among the groups: Control, IL-34, PGE<sub>2</sub>, and IL-34 plus PGE<sub>2</sub>, applying  
453 thresholds of log<sub>2</sub>FC>1 and adjusted p-value<0.05. To investigate the synergistic  
454 effects of IL-34 and PGE<sub>2</sub>, genes differentially expressed in all three pairwise  
455 comparisons, including IL-34 plus PGE<sub>2</sub> vs. PGE<sub>2</sub>, IL-34 plus PGE<sub>2</sub> vs. IL-34, and IL-  
456 34 plus PGE<sub>2</sub> vs. Control, were identified as potential signature genes. A heatmap of  
457 these signature genes was generated using the ComplexHeatmap package (v2.22.0)(14),  
458 based on variance-stabilized counts obtained from DESeq2's variance stabilizing  
459 transformation function.

460

#### 461 **Processing of Smart-seq data**

462 The transcriptional profiles of CD138<sup>+</sup> and CD138<sup>-</sup> macrophages derived from

463 orthotopic tumors were analyzed using Smart-seq. Low-input libraries were constructed  
464 with the SMART-Seq v4 Ultra Low Input RNA Kit (Clontech), followed by cDNA  
465 synthesis, purification, and size selection. After adapter ligation and quality control  
466 using the Agilent 2100 Bioanalyzer, the libraries were sequenced on the Illumina  
467 platform employing a 2×150 bp paired-end protocol.

468 Raw FASTQ reads were aligned and quantified against the GRCm39 reference genome  
469 from ENSEMBL (<https://www.ensembl.org>) utilizing STAR software (v2.7.11b)(18).  
470 Transcript expression levels were normalized as TPM and log2-transformed for  
471 subsequent analyses. Differential expression analysis was performed using the limma  
472 package (v3.62.2)(19).

473

#### 474 **Gene set enrichment analysis (GSEA)**

475 GSEA (v4.3.2)(20, 21) was conducted to identify functional alterations in the  
476 MM1/*Sdc1*<sup>+</sup> TAM subset, utilizing Gene Ontology (GO) gene sets from the mouse  
477 collection of the Molecular Signatures Database (MSigDB)(22). The input data were  
478 derived from the normalized count matrix of the Seurat object, which was generated  
479 from sorted F4/80<sup>+</sup> cells.

480 GSEA was applied to genes that were synergistically regulated by IL-34 and PGE<sub>2</sub>  
481 treatment, and normalized enrichment scores (NES) were calculated for each monocyte  
482 and macrophage subtype. Furthermore, GSEA was performed on driver genes inferred  
483 for the *Sdc1*<sup>+</sup> TAM lineage using the GSEA function from the clusterProfiler package  
484 (v4.12.0)(23), with results ranked according to NES.

485 For CD8<sup>+</sup> T cells within the orthotopic tumors derived from mice that underwent  
486 adoptive transfer, as well as from control and Sdc1-cKO mice, GSEA was conducted  
487 referencing to the M2, M5, and Mh gene sets from the MSigDB database(22).

488 The IFN $\gamma$  production score was calculated using the AddModuleScore function of  
489 Seurat, with the gene set comprising *Ifng*, *Gzmb*, *Gzma*, *Gzmk*, and *Prf1*(24).

490

#### 491 **Kyoto Encyclopedia of Genes and Genomes (KEGG) enrichment analysis**

492 Enrichment analysis of the KEGG database (Release 106.0) was performed using a  
493 custom database generated via the `create_kegg_db` function from the `createKEGGdb`  
494 package (v0.0.3). For bulk RNA-seq data, genes exhibiting  $|\log_2FC| > 1$  and an adjusted  
495 p-value < 0.05 were classified as either upregulated or downregulated. A hypergeometric  
496 test was utilized to identify enriched KEGG pathways for both upregulated and  
497 downregulated genes, employing the `enrichKEGG` function in `clusterProfiler` with  
498 default parameters. In the context of single-cell RNA-seq, features with  $\log_2FC > 1$ ,  
499 Pct.1 > 0.2, and an adjusted p-value < 0.05 were designated as marker genes of *Sdc1*<sup>+</sup>  
500 TAMs and served as the input data for KEGG enrichment analysis. In the analysis of  
501 Smart-seq data, genes with a  $\log_2FC$  greater than 1 and an adjusted p-value of less than  
502 0.2 were classified as upregulated, serving as the input data for KEGG enrichment  
503 analysis. Only terms with an adjusted p-value of less than 0.2 were retained for further  
504 interpretation.

505

#### 506 **mIHC analysis**

507 All mIHC data were analyzed using PanoScore software (Panovue, Beijing, China). In  
508 Panel 1 and 2, cell types were identified based on the specific markers outlined  
509 previously, and the cell numbers, proportions and tissue areas were subsequently  
510 calculated. In Panel 3, TAMs were identified as CD68<sup>+</sup> and neutrophils as CD66B<sup>+</sup>.  
511 Subtypes were delineated based on the upper quantile expression of CD138 in TAMs  
512 and the median expression of SIGLEC-8 in neutrophils. We identified SIGLEC-8<sup>+</sup>  
513 neutrophils in proximity to either CD138<sup>+</sup> or CD138<sup>-</sup> TAMs within a maximum distance  
514 of 20 $\mu$ m. The effective score and effective percent, which estimate the relative spatial  
515 positioning as previously described(25), were calculated for CD138<sup>+</sup> and CD138<sup>-</sup>  
516 TAMs in Cohort 2 and Cohort 3. In brief, the effective score denotes the average number  
517 of SIGLEC-8<sup>+</sup> neutrophils paired with CD138<sup>+</sup> or CD138<sup>-</sup> TAMs, while the effective  
518 percent represents the proportion of CD138<sup>+</sup> or CD138<sup>-</sup> TAMs that are paired with at  
519 least one SIGLEC-8<sup>+</sup> neutrophil among all CD138<sup>+</sup> or CD138<sup>-</sup> TAMs.

520

521

522 **Supplemental references**

- 523 1. Hao Y, et al. Integrated analysis of multimodal single-cell data. *Cell*.  
524 2021;184(13):3573-3587.e29.
- 525 2. Hafemeister C, Satija R. Normalization and variance stabilization of single-cell  
526 RNA-seq data using regularized negative binomial regression. *Genome Biol*.  
527 2019;20(1):1–15.
- 528 3. Choudhary S, Satija R. Comparison and evaluation of statistical error models for  
529 scRNA-seq. *Genome Biol*. 2022;23(1):1–20.
- 530 4. Korsunsky I, et al. Fast, sensitive and accurate integration of single-cell data with  
531 Harmony. *Nat Methods*. 2019;16(12):1289–1296.
- 532 5. Becht E, et al. Dimensionality reduction for visualizing single-cell data using UMAP.  
533 *Nat Biotechnol*. 2019;37:38–44.
- 534 6. Aney KJ, et al. Novel Approach for Pancreas Transcriptomics Reveals the Cellular  
535 Landscape in Homeostasis and Acute Pancreatitis. *Gastroenterology*.  
536 2024;166(6):1100–1113.
- 537 7. Jin S, Plikus M V, Nie Q. CellChat for systematic analysis of cell-cell communication  
538 from single-cell transcriptomics. *Nat Protoc*. 2025;20(1):180–219.
- 539 8. Jin S, et al. Inference and analysis of cell-cell communication using CellChat. *Nat*  
540 *Commun*. 2021;12(1):1088.
- 541 9. Trapnell C, et al. The dynamics and regulators of cell fate decisions are revealed by  
542 pseudotemporal ordering of single cells. *Nat Biotechnol*. 2014;32(4):381–386.
- 543 10. Qiu X, et al. Reversed graph embedding resolves complex single-cell trajectories.

544 *Nat Methods*. 2017;14(10):979–982.

545 11. Cao J, et al. The single-cell transcriptional landscape of mammalian organogenesis.  
546 *Nature*. 2019;566(7745):496–502.

547 12. Weiler P, et al. CellRank 2: unified fate mapping in multiview single-cell data. *Nat*  
548 *Methods*. 2024;21(7):1196–1205.

549 13. Reuter B, et al. Generalized Markov State Modeling Method for Nonequilibrium  
550 Biomolecular Dynamics: Exemplified on Amyloid  $\beta$  Conformational Dynamics Driven  
551 by an Oscillating Electric Field. *J Chem Theory Comput*. 2018;14(7):3579–3594.

552 14. Gu Z. Complex heatmap visualization. *iMeta*. 2022;1(3):e43.

553 15. Hänzelmann S, Castelo R, Guinney J. GSVA: gene set variation analysis for  
554 microarray and RNA-seq data. *BMC Bioinformatics*. 2013;14:7.

555 16. Patro R, et al. Salmon provides fast and bias-aware quantification of transcript  
556 expression. *Nat Methods*. 2017;14(4):417–419.

557 17. Love MI, Huber W, Anders S. Moderated estimation of fold change and dispersion  
558 for RNA-seq data with DESeq2. *Genome Biol*. 2014;15(12):550.

559 18. Dobin A, et al. STAR: ultrafast universal RNA-seq aligner. *Bioinformatics*.  
560 2013;29(1):15–21.

561 19. Ritchie ME, et al. limma powers differential expression analyses for RNA-  
562 sequencing and microarray studies. *Nucleic Acids Res*. 2015;43(7):e47.

563 20. Subramanian A, et al. Gene set enrichment analysis: A knowledge-based approach  
564 for interpreting genome-wide expression profiles. *Proc Natl Acad Sci U S A*.  
565 2005;102(43):15545–15550.

- 566 21. Mootha VK, et al. PGC-1alpha-responsive genes involved in oxidative  
567 phosphorylation are coordinately downregulated in human diabetes. *Nat Genet.*  
568 2003;34(3):267–273.
- 569 22. Liberzon A, et al. The Molecular Signatures Database Hallmark Gene Set  
570 Collection. *Cell Syst.* 2015;1(6):417–425.
- 571 23. Wu T, et al. clusterProfiler 4.0: A universal enrichment tool for interpreting omics  
572 data. *Innovation.* 2021;2(3):100141.
- 573 24. Liu Y, et al. Syndecan-1 inhibition promotes antitumor immune response and  
574 facilitates the efficacy of anti-PD1 checkpoint immunotherapy. *Sci Adv.*  
575 2024;10(37):eadi7764.
- 576 25. Jia K, et al. Multiplex immunohistochemistry defines the tumor immune  
577 microenvironment and immunotherapeutic outcome in CLDN18.2-positive gastric  
578 cancer. *BMC Med.* 2022;20(1):223.
- 579 26. Han S, et al. A Novel Subset of Anti-Inflammatory CD138(+) Macrophages Is  
580 Deficient in Mice with Experimental Lupus. *J Immunol.* 2017;199(4):1261–1274.
- 581
- 582

583 **Supplemental Figures**

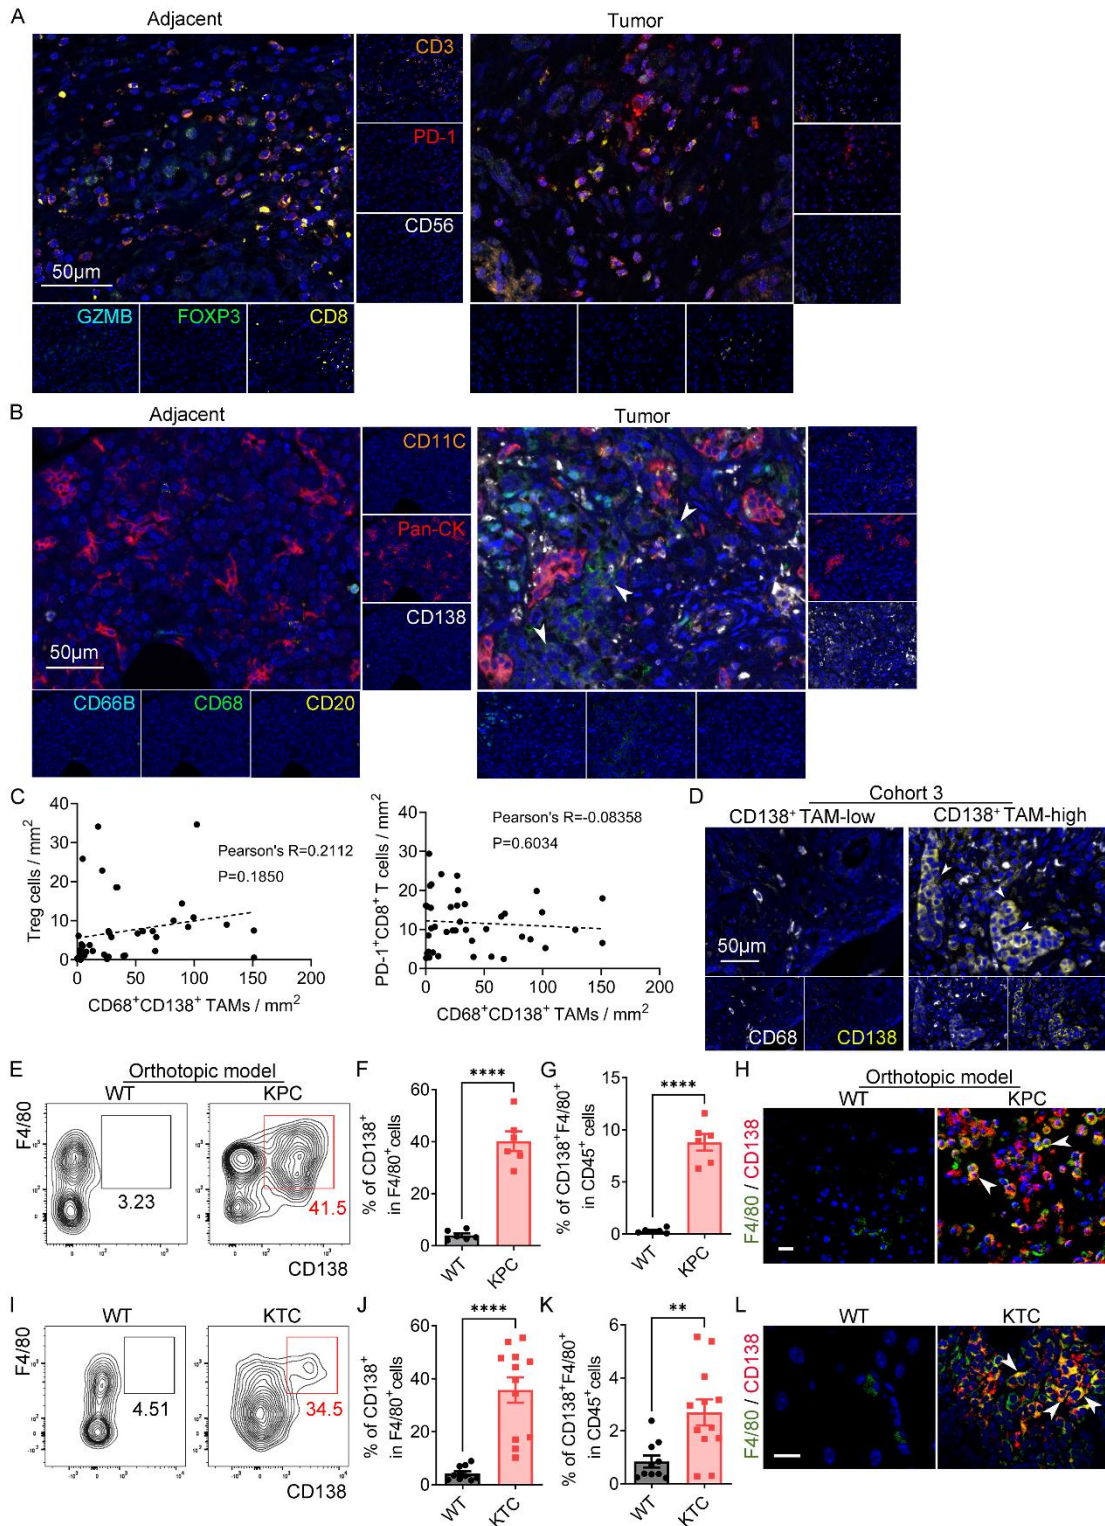

584

585 **Supplemental Figure 1. The expansion of a CD138<sup>+</sup> TAM population is found in**

586 **both PDAC patients and corresponding mouse models. (A and B) Representative**

587 **mIHC images depicting the cell types illustrated in Figure 1, A-C, with CD138<sup>+</sup>CD68<sup>+</sup>**

588 TAMs indicated by white arrows. (C) Correlation among the abundance of CD138<sup>+</sup>  
589 TAMs, Treg cells, and exhausted CD8<sup>+</sup> T cells in tumor tissues from PDAC patients in  
590 Cohort 2 (n=41). (D) Representative images displaying CD68<sup>+</sup>CD138<sup>+</sup> macrophages  
591 (white arrows) in the CD138<sup>+</sup> TAM-low and CD138<sup>+</sup> TAM-high groups from PDAC  
592 patients in Cohort 3. (E and I) Flow cytometric plots depicting CD138<sup>+</sup>F4/80<sup>+</sup>  
593 macrophages in the tumor tissues of orthotopic KPC (E) and KTC (I) mice. (F and G)  
594 Quantification of (E) (n=6 per group). (H and L) Immunofluorescence microscopy  
595 images of tumors from orthotopic KPC (H) and KTC mice (L), revealing the presence  
596 of CD138<sup>+</sup>F4/80<sup>+</sup> macrophages (white arrows). Scale bar, 10µm. (J and K)  
597 Quantification of (I) (n=10-12 per group). \*\*p<0.01 and \*\*\*\*p<0.0001 by unpaired t  
598 test (F, G, J, and K). Data represent mean ± SEM.

599

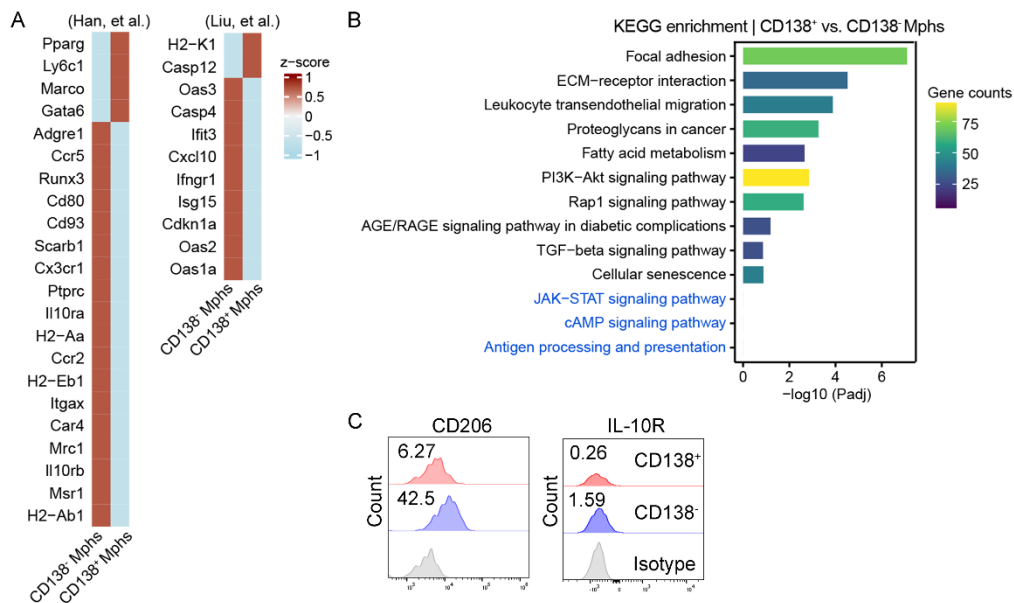

600

601 **Supplemental Figure 2. CD138<sup>+</sup> TAMs do not exhibit anti-inflammatory**

602 **properties in PDAC.** (A) Heatmaps displaying the relative expression levels of

603 signature genes associated with anti-inflammatory CD138<sup>+</sup> macrophages, along with

604 genes down-regulated by syndecan-1(24, 26), in both CD138<sup>+</sup> and CD138<sup>-</sup>  
605 macrophages derived from orthotopic tumors. **(B)** KEGG enrichment analysis of DEGs  
606 between CD138<sup>+</sup> and CD138<sup>-</sup> macrophages isolated from orthotopic tumors. Pathways  
607 previously identified as activated in anti-inflammatory CD138<sup>+</sup> macrophages,  
608 alongside those down-regulated by syndecan-1(blue), are additionally included in the  
609 bar plot (24, 26). **(C)** Flow cytometric images illustrating the frequencies of CD206<sup>+</sup>  
610 and IL-10R<sup>+</sup> cells in CD138<sup>-</sup> (blue line) and CD138<sup>+</sup> (red line) TAMs derived from  
611 PDAC patients in Cohort 1. The isotype control is depicted by the gray line.  
612

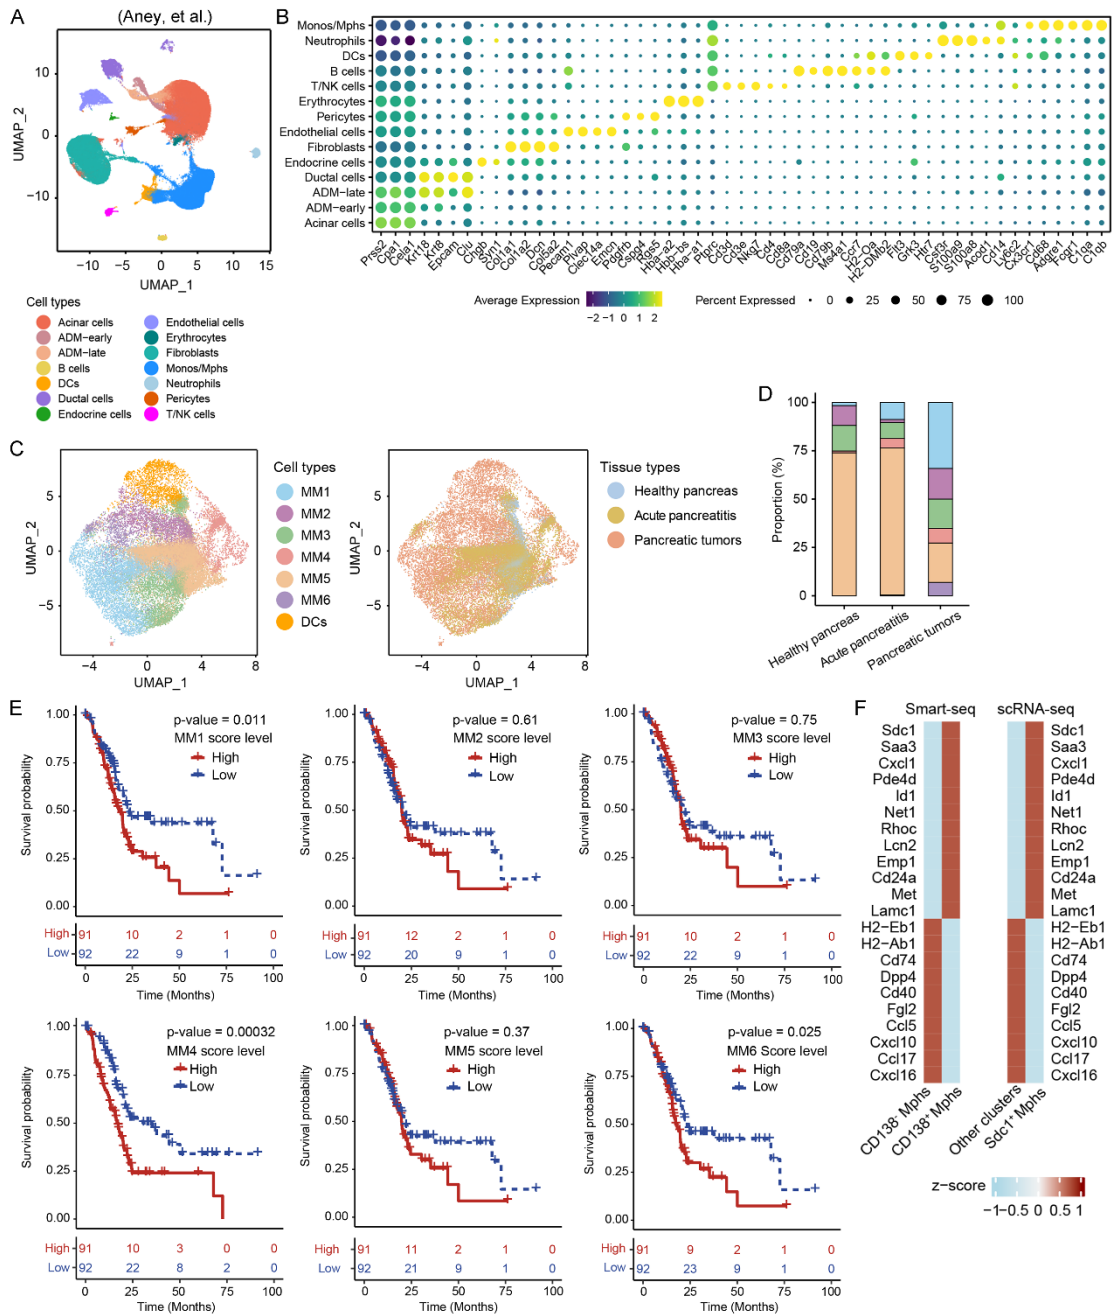

613

614 **Supplemental Figure 3. A pro-inflammatory CD138<sup>+</sup> macrophage subset is**

615 **expanded and correlated with poor prognosis in PDAC. (A)** UMAP plot displaying

616 viable cells in the pancreas of both healthy and acute pancreatitis mice, with colors

617 indicating distinct scRNA-seq clusters. **(B)** Bubble plot presenting selected cell type-

618 specific markers across all clusters, with clustering performed as detailed in **(A)**. The

619 size of the dots represents the proportion of cells expressing a specific marker, while

620 the intensity of the color indicates the level of mean expression. Legends are provided  
 621 below. (C) UMAP plots depicting macrophages in the pancreas of healthy and acute  
 622 pancreatitis mice, as well as F4/80<sup>+</sup> cells sorted from orthotopic tumors, with colors  
 623 representing scRNA-seq clusters (left) and the source of the cells (right). (D)  
 624 Proportions of macrophage subsets in the pancreas of healthy and acute pancreatitis  
 625 mice, as well as in orthotopic tumors. (E) Survival probabilities of PDAC patients  
 626 classified into high- and low-score groups from the TCGA dataset, stratified by GSVA  
 627 enrichment scores for each macrophage subset. (F) Heatmaps illustrating the scaled  
 628 expression of common genes between DEGs of CD138<sup>+</sup> versus CD138<sup>-</sup> macrophages  
 629 from orthotopic tumors and marker genes of *Sdc1*<sup>+</sup> macrophage subset (MM1).

630

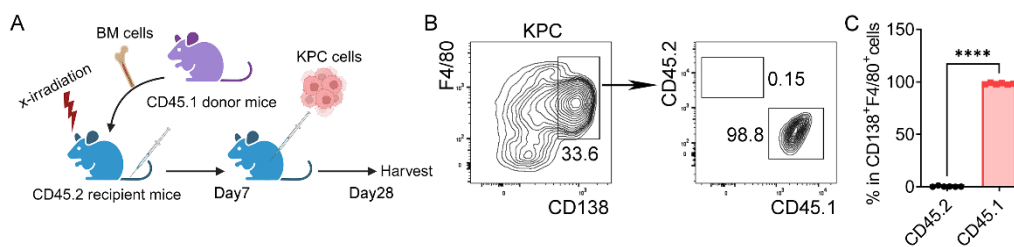

631

632 **Supplemental Figure 4. CD138<sup>+</sup> TAMs originate from circulating monocytes. (A)**

633 Experimental approach employed to assess the origin of CD138<sup>+</sup> TAMs utilized a

634 CD45.1/CD45.2 chimera mouse model. (B) Frequencies of CD45.1<sup>+</sup> and CD45.2<sup>+</sup> cells

635 within CD138<sup>+</sup>F4/80<sup>+</sup> macrophages in the tumor tissues of CD45.1/CD45.2 chimera

636 mice bearing orthotopic KPC tumors. (C) Quantification of (B) (n=6 per group).

637 \*\*\*\*p<0.0001 by unpaired t-test (C). Data represent mean ± SEM.

638

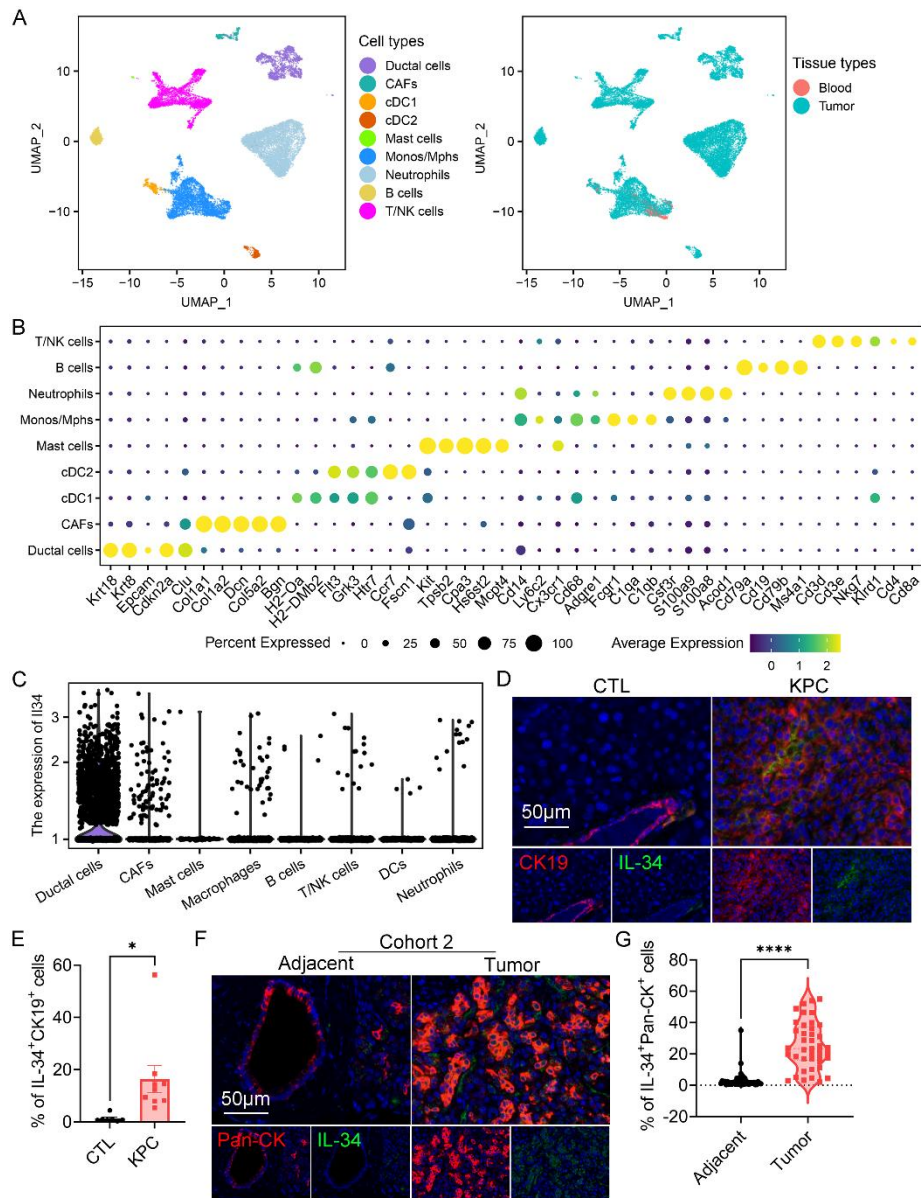

639

640 **Supplemental Figure 5. The expression levels of IL-34 are elevated in pancreatic**

641 **tumor cells. (A)** UMAP plots illustrating viable cells in the peripheral blood and tumor

642 tissues of orthotopic KPC mice, with colors indicating scRNA-seq clusters (left) and

643 the source of the cells (right). **(B)** Bubble plot displaying selected cell type-specific

644 markers across all clusters, with clustering performed as detailed in **(A)**. **(C)** Expression

645 levels of *Il34* across all clusters in tumor tissues depicted in **(A)**. **(D)** mIHC images

646 highlighting IL-34<sup>+</sup>CK19<sup>+</sup> ductal cells in tumor tissues from mice with orthotopic KPC

647 tumors, as well as in the pancreas of healthy mice. CK19 is a well-known marker for

648 ductal cells in the pancreas of mice. **(E)** Quantification of **(D)**, showcasing the  
649 percentages of IL-34<sup>+</sup>CK19<sup>+</sup> cells within the total cells in each tissue section (n=7-9 per  
650 group). **(F)** Representative images illustrating IL-34 expression in ductal cells in paired  
651 adjacent benign and tumor tissues from PDAC patients in Cohort 2. Pan-CK serves as  
652 a well-established marker for ductal cells in PDAC patients. **(G)** Quantification of **(F)**,  
653 illustrating the percentages of IL-34<sup>+</sup>Pan-CK<sup>+</sup> cells within the total cells in each tissue  
654 core (n=41 per group). \*p<0.05 and \*\*\*\*p<0.0001 by paired or unpaired t-tests **(E** and  
655 **G)**. Data represent mean ± SEM.

656

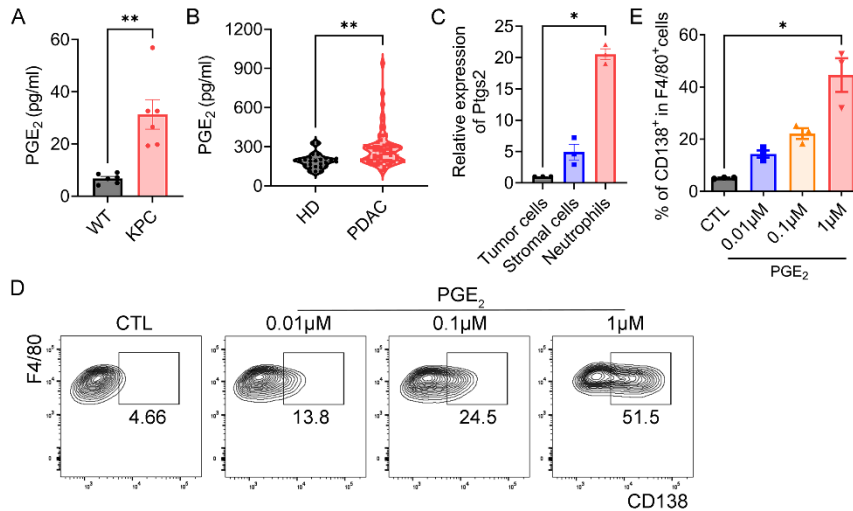

657

658 **Supplemental Figure 6. PGE<sub>2</sub> induces the expression of syndecan-1 on BMDMs in**

659 **a dose-dependent manner. (A and B)** The serum levels of PGE<sub>2</sub> in wild-type mice and

660 mice bearing orthotopic KPC tumors (A, n=6 per group), as well as in healthy donors

661 (HD, n=26) and patients with PDAC (n=63) (B). (C) RT-PCR analysis measuring the

662 expression levels of *Ptgs2* in GFP<sup>+</sup> tumor cells, GFP<sup>-</sup>CD45<sup>-</sup> stromal cells, and

663 CD45<sup>+</sup>Ly6g<sup>+</sup>GFP<sup>-</sup> neutrophils sorted from GFP<sup>+</sup> orthotopic tumors ten days post-tumor

664 implantation (n=3 per group). (D) Flow cytometric images illustrating the expression

665 of CD138 in F4/80<sup>+</sup> macrophages derived from BMDM cultures exposed to varying

666 concentrations of PGE<sub>2</sub>. (E) Quantification of (D) (n=3 per group). \*p<0.05 and

667 \*\*p<0.01 by unpaired t-test (A and B) and by Kruskal-Wallis test with Dunn's multiple

668 comparison test (C and E). Data represent mean ± SEM.

669

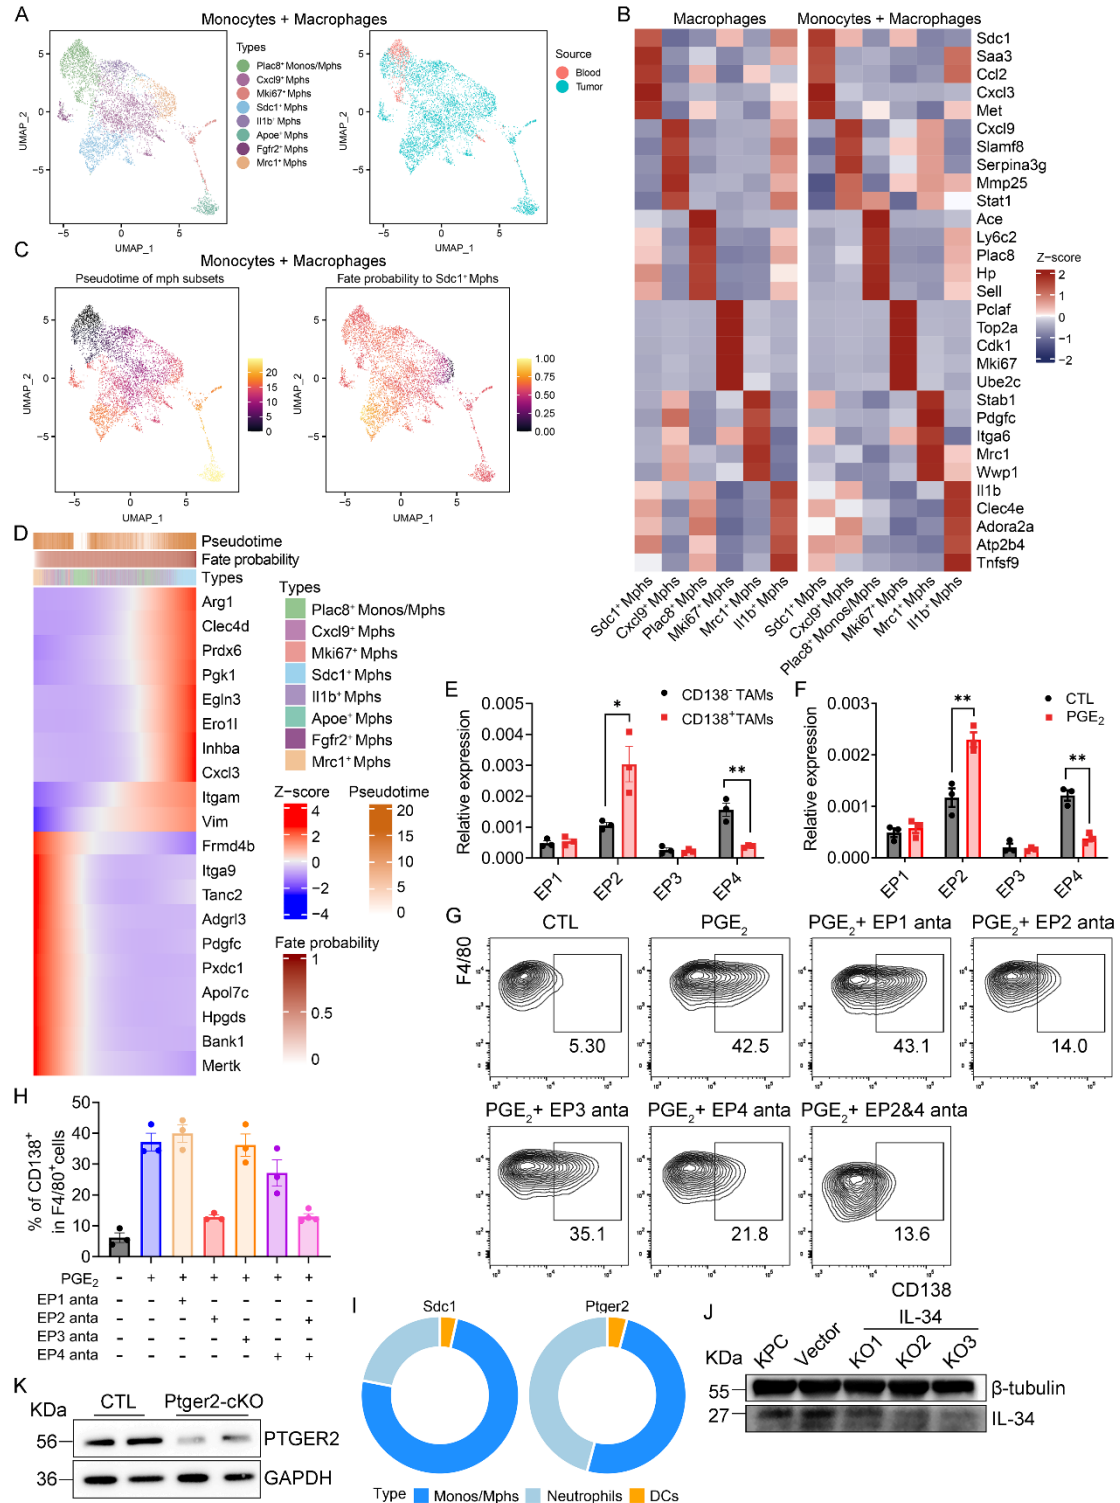

670

671 **Supplemental Figure 7. The PGE<sub>2</sub>-EP2 signaling induces the expression of**

672 **syndecan-1 on BMDMs. (A) UMAP plots showing the reclustering of**

673 **monocytes/macrophages from the dataset presented in Supplemental Figure 5A.**

674 **Colors denote the various monocyte/macrophage subclusters (left) and the source of the**

675 cells (right). **(B)** Heatmaps illustrating the scaled expression of marker genes across  
676 monocyte/macrophage subsets, with reclustering executed as described in **(A)**. **(C)**  
677 Pseudotime trajectory of single-cell transcriptomes of monocyte/macrophage subsets  
678 calculated using Monocle 3. The intensity of color indicates the levels of pseudotime  
679 (left). The fate probability of the monocyte-to-*Sdc1*<sup>+</sup> TAM trajectory is calculated by  
680 CellRank. The intensity of color represents levels of fate probability (right).  
681 Reclustering of monocytes/macrophages is performed as outlined in **(A)**. **(D)** Heatmap  
682 of driver genes promoting the monocyte-to-*Sdc1*<sup>+</sup> TAM trajectory, as calculated by  
683 CellRank. **(E and F)** RT-PCR analysis measuring the expression levels of PGE<sub>2</sub>  
684 receptors in CD138<sup>-</sup>F4/80<sup>+</sup> and CD138<sup>+</sup>F4/80<sup>+</sup> macrophages isolated from tumor  
685 tissues of orthotopic KPC mice **(E)** and from BMDM cultures exposed to 1μM PGE<sub>2</sub>  
686 **(F)** (n=3 per group). **(G)** Flow cytometric images illustrating the expression of CD138  
687 in F4/80<sup>+</sup> macrophages from BMDM cultures exposed to 1μM PGE<sub>2</sub>, with or without  
688 EP1, EP2, EP3, and/or EP4 antagonists. **(H)** Quantification of **(G)** (n=3-4 per group).  
689 **(I)** Percentages of monocytes/macrophages, neutrophils, and DCs in *Sdc1*<sup>-</sup> and *Ptger2*<sup>-</sup>  
690 expressing myeloid cells derived from orthotopic tumors. Clustering is illustrated in  
691 **Supplemental Figure 5A**. **(J and K)** Western blot analysis evaluating the expression  
692 levels of IL-34 (27kDa) in KPC cells transfected with lentivirus **(J)**, as well as PTGER2  
693 (56kDa) in BMDMs from control and *Ptger2*-cKO mice **(K)**. Equal loading is  
694 confirmed by quantifying β-tubulin (55kDa) and GAPDH (36kDa), respectively.  
695 \*p<0.05 and \*\*p<0.01 by unpaired t-test **(E and F)**. Data represent mean ± SEM.

696

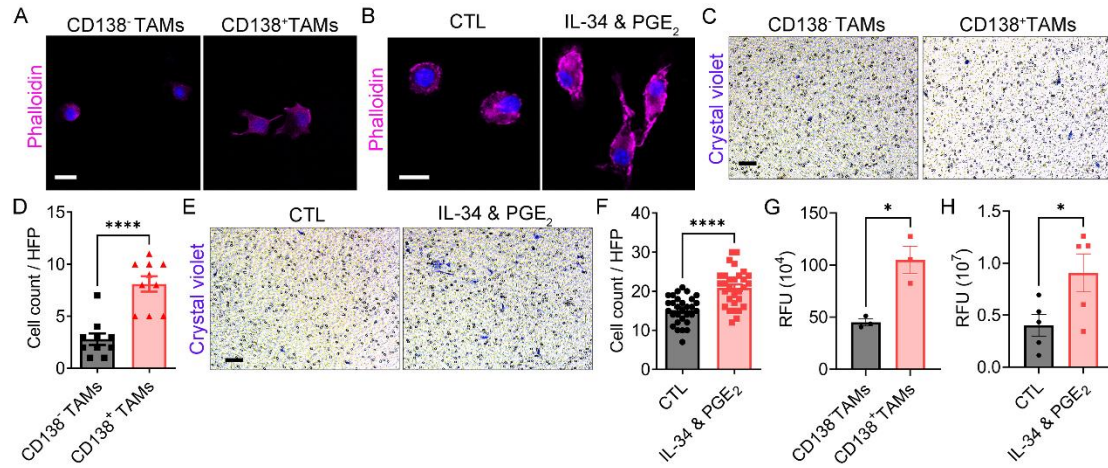

697

698 **Supplemental Figure 8. CD138<sup>+</sup> macrophages co-induced by IL-34 and PGE<sub>2</sub>**

699 **exhibit a phenotype comparable to that of CD138<sup>+</sup> TAMs from orthotopic tumors.**

700 (A and B) Phalloidin staining images showing the morphology of CD138<sup>-</sup> F4/80<sup>+</sup> and

701 CD138<sup>+</sup> F4/80<sup>+</sup> macrophages isolated from the tumor tissues of orthotopic KPC mice

702 (A), as well as from BMDM cultures exposed to IL-34 and PGE<sub>2</sub> (B). Scale bar, 10µm.

703 (C and E) Representative crystal violet staining images illustrating the migration of

704 CD138<sup>-</sup>F4/80<sup>+</sup> and CD138<sup>+</sup>F4/80<sup>+</sup> macrophages through the membrane of inserts in

705 transwell culture systems. The cells were isolated from orthotopic tumors (C) and from

706 BMDM cultures exposed to IL-34 and PGE<sub>2</sub> (E). Scale bar, 50µm. (D and F)

707 Quantification of the number of cells depicted in (C) (D, n =10 per group) and (E) (F,

708 n =30 per group). (G and H) Cell phagocytotic ability of CD138<sup>-</sup>F4/80<sup>+</sup> and

709 CD138<sup>+</sup>F4/80<sup>+</sup> macrophages assessed using pHrodo™ Deep Red E. coli BioParticles™

710 Conjugate. The cells were isolated from orthotopic tumors (G) and from BMDM

711 cultures exposed to IL-34 and PGE<sub>2</sub> (H). The graphs show the quantification of

712 fluorescence signals (n=3 per group in (G) and n=5 per group in (H)). \*p<0.05 and

713 \*\*\*\*p<0.0001 by unpaired t-test (D and F-H). Data represent mean ± SEM.

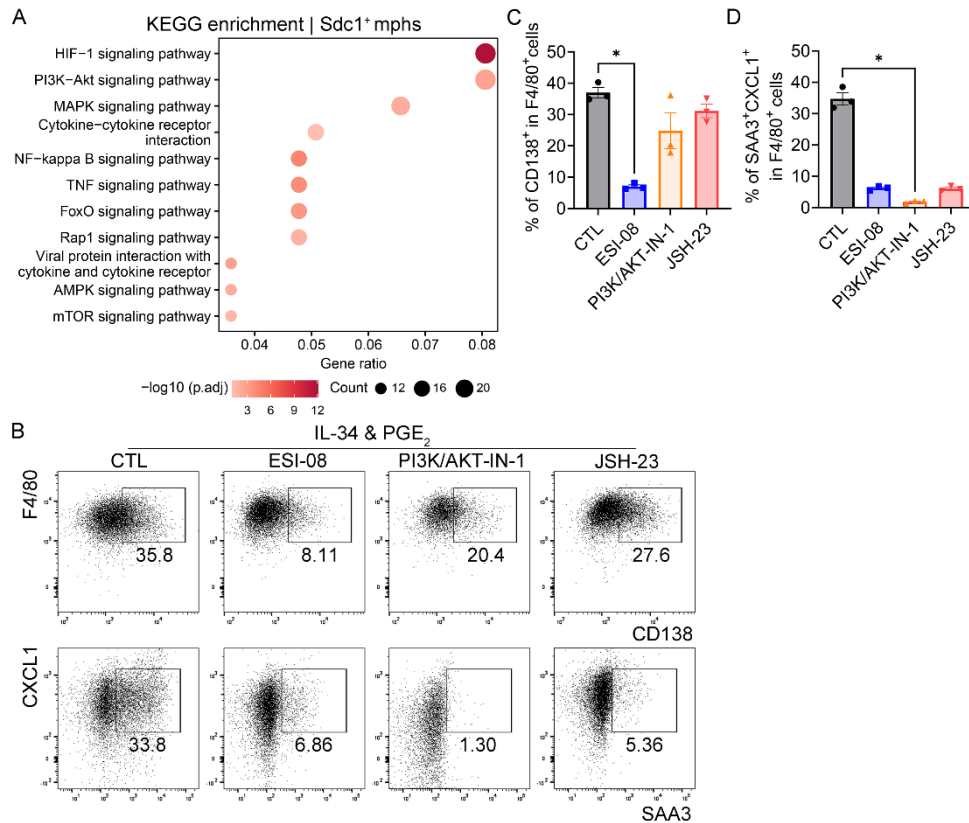

715

716 **Supplemental Figure 9. IL-34 and PGE<sub>2</sub> collaboratively induce the differentiation**717 **of BMDMs into CD138<sup>+</sup> macrophages through the activation of PI3K/Akt/NF-κB**718 **and EPAC/Rap1 signaling pathways. (A) KEGG enrichment analysis of signaling**719 **pathways related to environmental information processing on genes ranked by log<sub>2</sub>FC**720 **between *Sdc1*<sup>+</sup> macrophages and other monocyte/macrophage subsets. Reclustering of**721 **monocytes/macrophages is performed as illustrated in Supplemental Figure 7A. (B)**722 **Representative images depicting the expression of CD138, CXCL1, and SAA3 in**723 **F4/80<sup>+</sup> macrophages from BMDM cultures exposed to IL-34 plus PGE<sub>2</sub>, with or**724 **without the addition of ESI-08 (an EPAC/Rap1 pathway antagonist), PI3K/AKT-IN-1**725 **(a PI3K-Akt pathway inhibitor), or JSH-23 (an NF-κB pathway inhibitor). (C and D)**726 **Quantification of (B) (n=3 per group). \*p<0.05 by Kruskal-Wallis test with Dunn's**

727 multiple comparison test (C and D). Data represent mean  $\pm$  SEM.

728

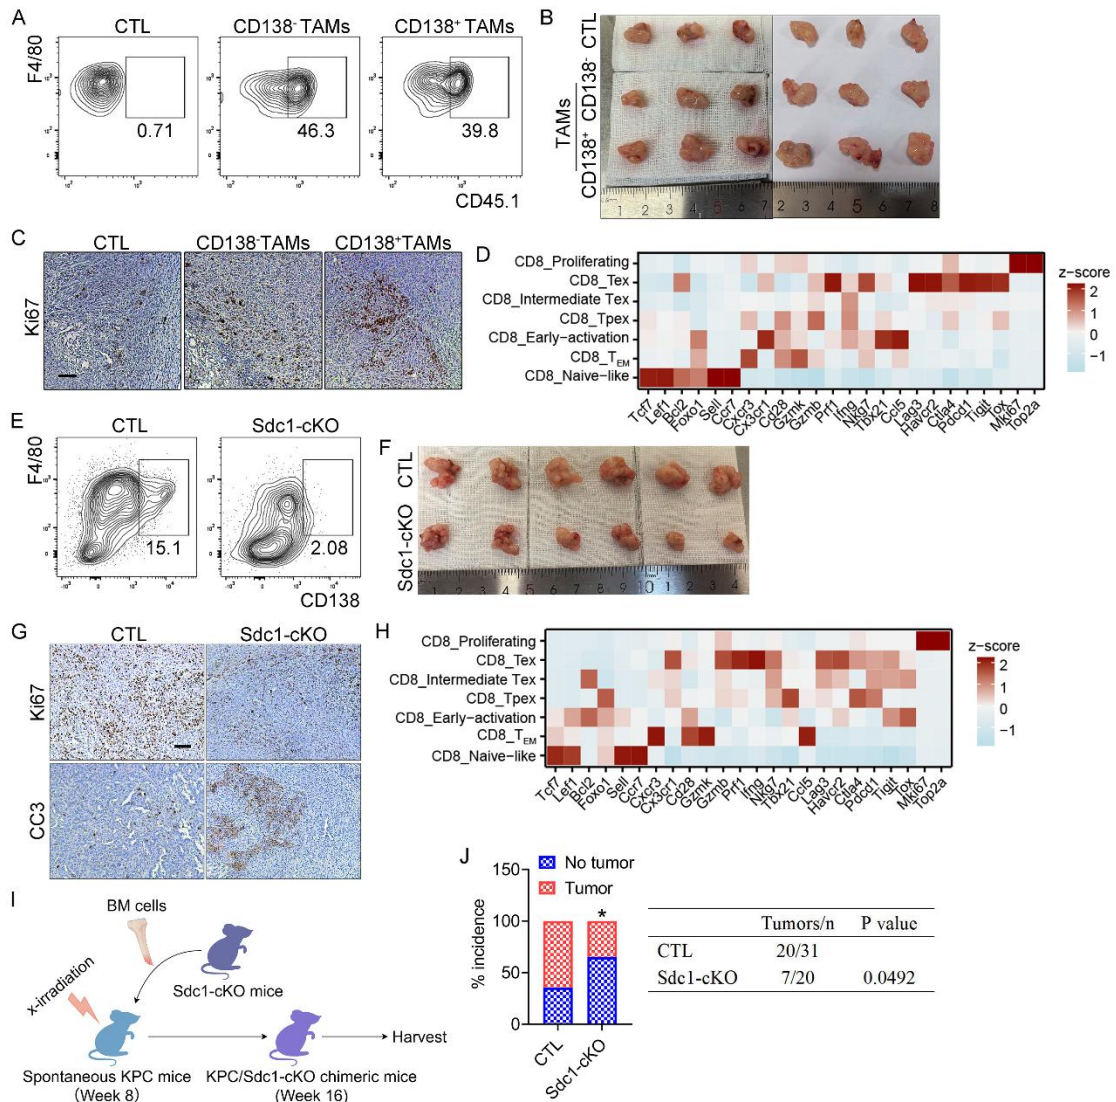

729

730 **Supplemental Figure 10. CD138<sup>+</sup> TAMs promote pancreatic tumor growth in**

731 **murine models. (A)** Flow cytometric images indicating the presence of CD45.1<sup>+</sup> cells

732 among F4/80<sup>+</sup> macrophages within the tumor tissues of CD45.2<sup>+</sup> mice following

733 adoptive transfer, as illustrated in **Figure 4A**. **(B)** Images showing the harvested tumor

734 tissues from mice post-adoptive transfer. **(C)** Immunohistochemical microscopy images

735 depicting Ki67<sup>+</sup> cells in tumor tissues from mice after adoptive transfer. Scale bar, 50 $\mu$ m

736 **m. (D)** Heatmap illustrating the scaled expression of genes related to T cell proliferation,

737 activation, and exhaustion across tumor-infiltrating CD8<sup>+</sup> T cell subsets in mice that  
 738 underwent adoptive transfer, with clustering performed as described in **Figure 4F**. **(E)**  
 739 Flow cytometric analysis revealing the presence of CD138<sup>+</sup>F4/80<sup>+</sup> TAMs in control and  
 740 Sdc1-cKO mice with orthotopic KPC tumors. **(F)** Representative images showing the  
 741 harvested tumor tissues from control and Sdc1-cKO mice bearing orthotopic tumors.  
 742 **(G)** Immunohistochemical microscopy images displaying Ki67<sup>+</sup> cells and CC3<sup>+</sup> areas  
 743 in tumor tissues of control and Sdc1-cKO mice with orthotopic tumors. Scale bar, 50μ  
 744 m. **(H)** Heatmap illustrating the scaled expression of genes related to T cell proliferation,  
 745 activation, and exhaustion across tumor-infiltrating CD8<sup>+</sup> T cell subsets in control and  
 746 Sdc1-cKO mice bearing orthotopic tumors, with clustering executed as described in  
 747 **Figure 4O**. **(I)** Experimental methodology employed to assess the pro-tumorigenic  
 748 roles of CD138<sup>+</sup> TAMs involved the use of a KPC/Sdc1-cKO chimera mouse model.  
 749 **(J)** Tumor incidence rates in spontaneous KPC (CTL) and KPC/Sdc1-cKO chimera  
 750 (Sdc1-cKO) mice at 16 weeks of age. Tumor presence is confirmed by the observation  
 751 of a macroscopic tumor upon necropsy. \*p<0.05 by two-sided Fisher's exact test **(J)**.  
 752

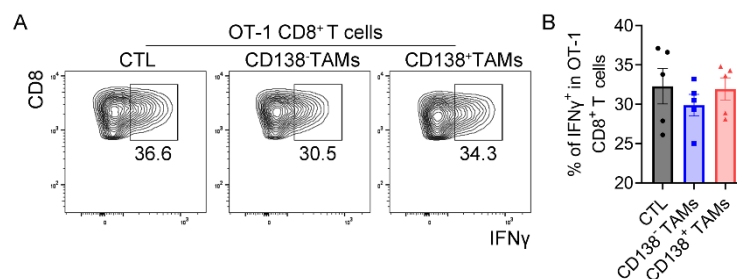

753  
 754 **Supplemental Figure 11. CD138<sup>+</sup> TAMs do not directly impede the activation of**  
 755 **CD8<sup>+</sup> T cells.** **(A)** Representative images depicting the production of IFN $\gamma$  by OT1  
 756 CD8<sup>+</sup> T cells from co-cultures of OT1 splenocytes with either CD138<sup>-</sup> or CD138<sup>+</sup> TAMs

757 sorted from orthotopic KPC mice. **(B)** Quantification of **(A)** (n=5 per group). Data

758 represent mean  $\pm$  SEM.

759

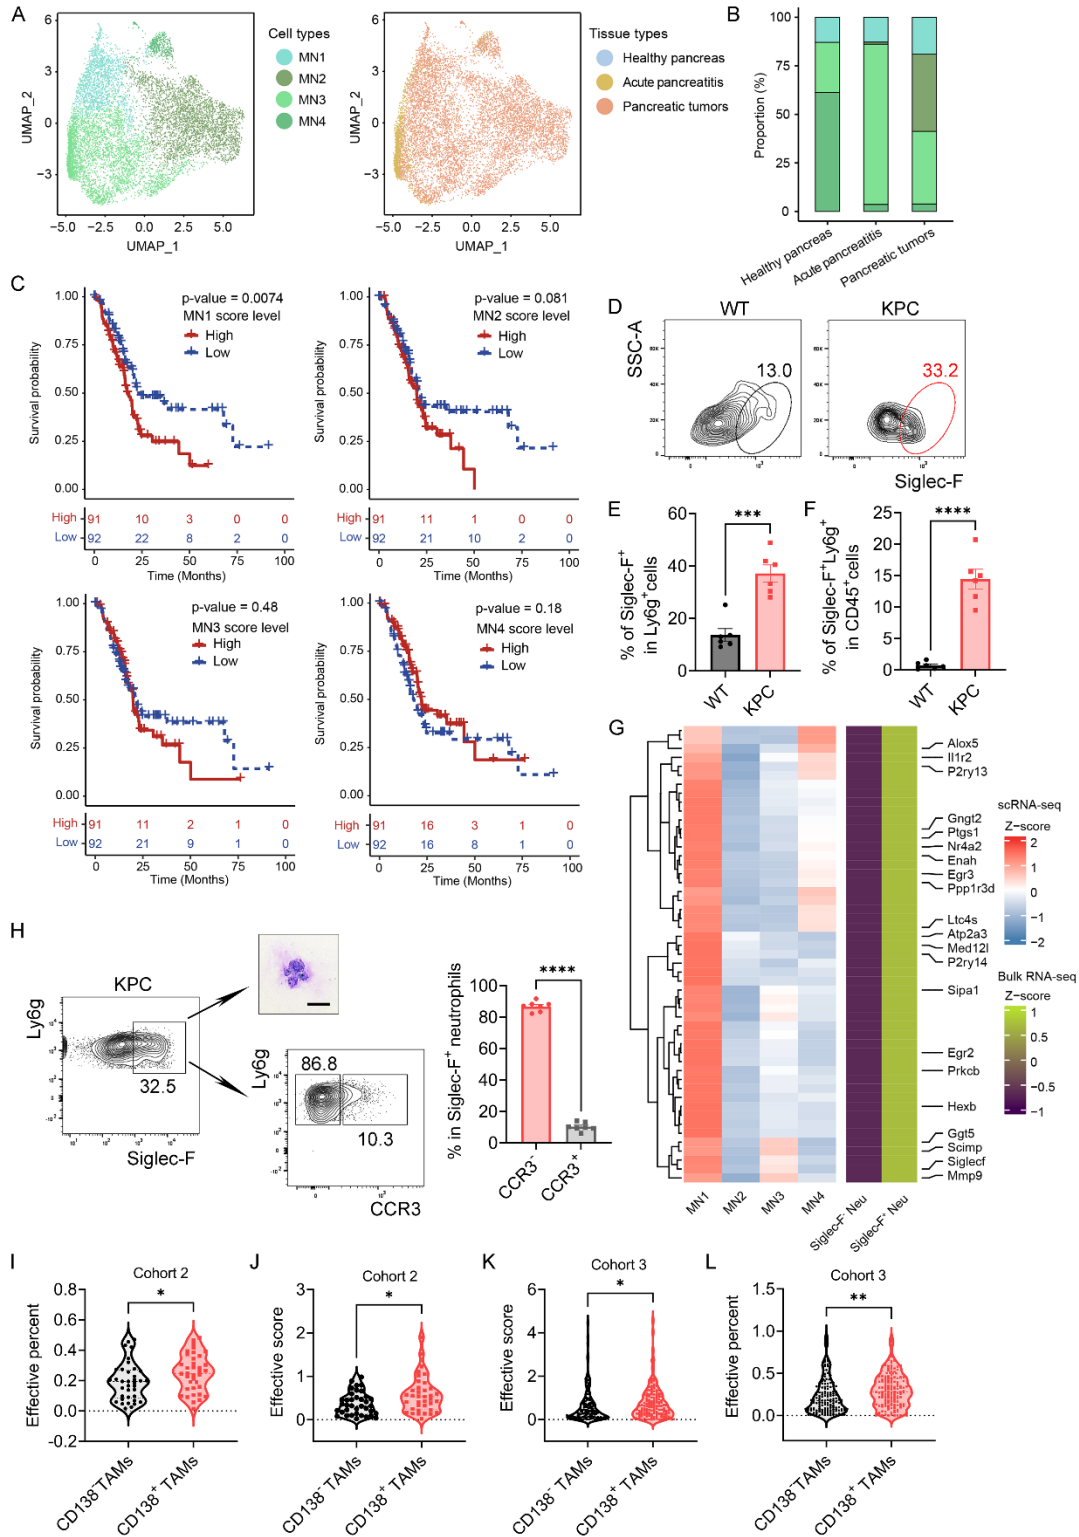

760

761 **Supplemental Figure 12. A Siglec-F<sup>+</sup> neutrophil subpopulation is expanded, co-**

762 **localized with CD138<sup>+</sup> TAMs, and is correlated with poor prognosis in PDAC. (A)**  
763 UMAP plots depicting neutrophils in the pancreas of healthy and acute pancreatitis  
764 mice, as well as in orthotopic tumors, with colors representing scRNA-seq clusters (left)  
765 and the source of the cells (right). **(B)** Proportions of neutrophil subsets in the pancreas  
766 of healthy and acute pancreatitis mice, as well as in orthotopic tumors. **(C)** Survival  
767 probabilities of PDAC patients categorized into high- and low-score groups from the  
768 TCGA dataset, stratified by GSVA enrichment scores for each neutrophil subset. **(D)**  
769 Representative images depicting the presence of Siglec-F<sup>+</sup> neutrophils in orthotopic  
770 tumors. **(E and F)** Quantification of **(D)**, revealing the frequencies of Siglec-F<sup>+</sup>  
771 neutrophils among Ly6g<sup>+</sup> cells **(E)** and CD45<sup>+</sup> cells **(F)** (n=6 per group). **(G)** Heatmaps  
772 illustrating the scaled expression of selected genes enriched in the gene set depicted in  
773 **Figure 5D**, across the neutrophil subsets shown in **Figure 5B**. **(H)** Images depicting  
774 the morphology and CCR3 expression levels of Ly6g<sup>+</sup>Siglec-F<sup>+</sup> cells isolated from  
775 orthotopic tumors. Scale bar, 20μm. **(I-L)** Comparison of the effective score and percent  
776 between CD138<sup>-</sup> and CD138<sup>+</sup> TAMs in tumor tissues from PDAC patients in Cohort 2  
777 **(I and J, n=37 per group)** and Cohort 3 **(K and L, n=153-154 per group)**. The effective  
778 score and percent are utilized to estimate the relative spatial position between CD138<sup>+</sup>  
779 TAMs and SIGLEC-8<sup>+</sup> neutrophils. \*p<0.05, \*\*p<0.01, \*\*\*p<0.001, and  
780 \*\*\*\*p<0.0001 by unpaired t-test **(E, F, and H-L)**. Data represent mean ± SEM.  
781

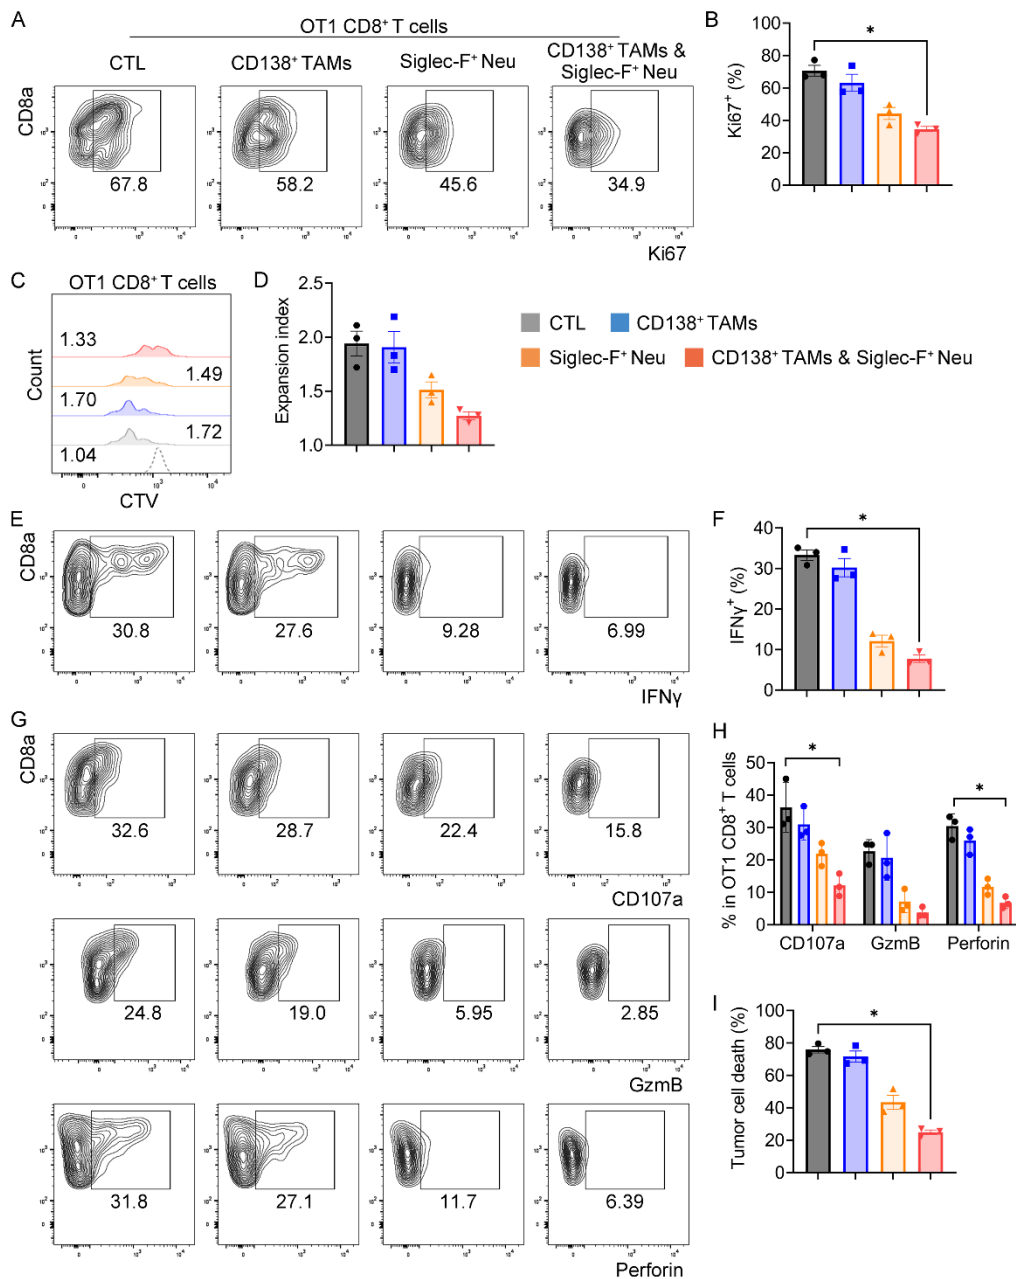

782

783 **Supplemental Figure 13. CD138<sup>+</sup> TAMs and Siglec-F<sup>+</sup> neutrophils synergistically**

784 **inhibit the activation of CD8<sup>+</sup> T cells.** (A, E, and G) Plots depicting the presence of

785 Ki67<sup>+</sup> (A), IFNγ<sup>+</sup> (E), and CD107a<sup>+</sup>, GzmB<sup>+</sup>, and Perforin<sup>+</sup> (G) cells among OT1 CD8<sup>+</sup>

786 T cells derived from co-cultures of splenocytes from OT1 transgenic mice, with or

787 without the inclusion of CD138<sup>+</sup> TAMs and/or Siglec-F<sup>+</sup> neutrophils sorted from

788 orthotopic tumors. (B, F, and H) Quantification of (A), (E), and (G), respectively (n=3

789 per group). (C and D) Representative histogram (C) and the expansion index (D) of

790 CTV-labeled activated OT1 CD8<sup>+</sup> T cells further expanded for two days, either in the  
 791 presence or absence of CD138<sup>+</sup> TAMs and/or Siglec-F<sup>+</sup> neutrophils derived from  
 792 orthotopic tumors (n=3 per group). The dashed line indicates the OT1 CD8<sup>+</sup> T cells that  
 793 are not activated by the OVA peptide. **(I)** Percentage of dead KPC-OVA cells in co-  
 794 cultures with OT1 CD8<sup>+</sup> T cells, with or without the presence of CD138<sup>+</sup> TAMs and/or  
 795 Siglec-F<sup>+</sup> neutrophils isolated from orthotopic tumors (Tumor: OT1: TAMs:  
 796 Neu=1:5:1:5, n=3 per group). \*p<0.05 by Kruskal-Wallis test with Dunn's multiple  
 797 comparison test **(B, F, H, and I)**. Data represent mean ± SEM.

798

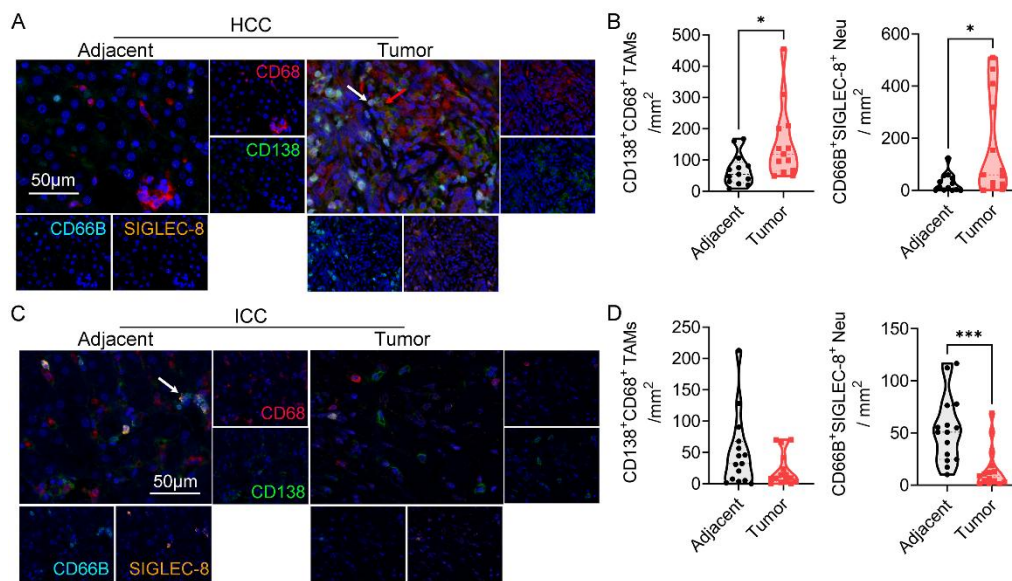

799

800 **Supplemental Figure 14. CD138<sup>+</sup> TAMs and SIGLEC-8<sup>+</sup> neutrophils are present**  
 801 **in tumor tissues from patients with HCC, but not in those with ICC. (A and C)**  
 802 Representative mIHC images illustrating the presence of CD138<sup>+</sup> TAMs (red arrow)  
 803 and SIGLEC-8<sup>+</sup> neutrophils (white arrow) in paired adjacent benign and tumor tissues  
 804 from HCC **(A)** and ICC **(C)** patients. **(B and D)** Quantitative analysis of **(A)** and **(C)**,  
 805 revealing the abundance of these two myeloid cell subsets in HCC **(B, n=13 per group)**

806 and ICC patients (D, n=15 per group). \*p<0.05 and \*\*\*p<0.001 by paired t-test (B and  
 807 D).  
 808

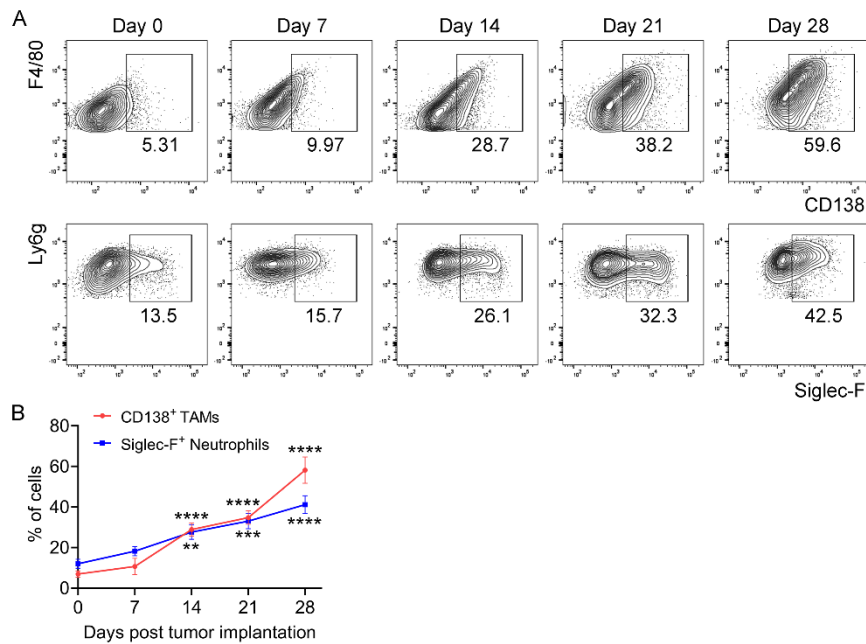

809  
 810 **Supplemental Figure 15. CD138<sup>+</sup> TAMs and Siglec-F<sup>+</sup> neutrophils are observed in**  
 811 **orthotopic tumors fourteen days after tumor implantation. (A)** Frequencies of  
 812 CD138<sup>+</sup> TAMs and Siglec-F<sup>+</sup> neutrophils measured at various timepoints following  
 813 tumor implantation. **(B)** Quantification of **(A)** (n=6-7 per group). \*\*p<0.01,  
 814 \*\*\*p<0.001, and \*\*\*\*p<0.0001 by unpaired t-test **(B)**. Data represent mean ± SEM.  
 815

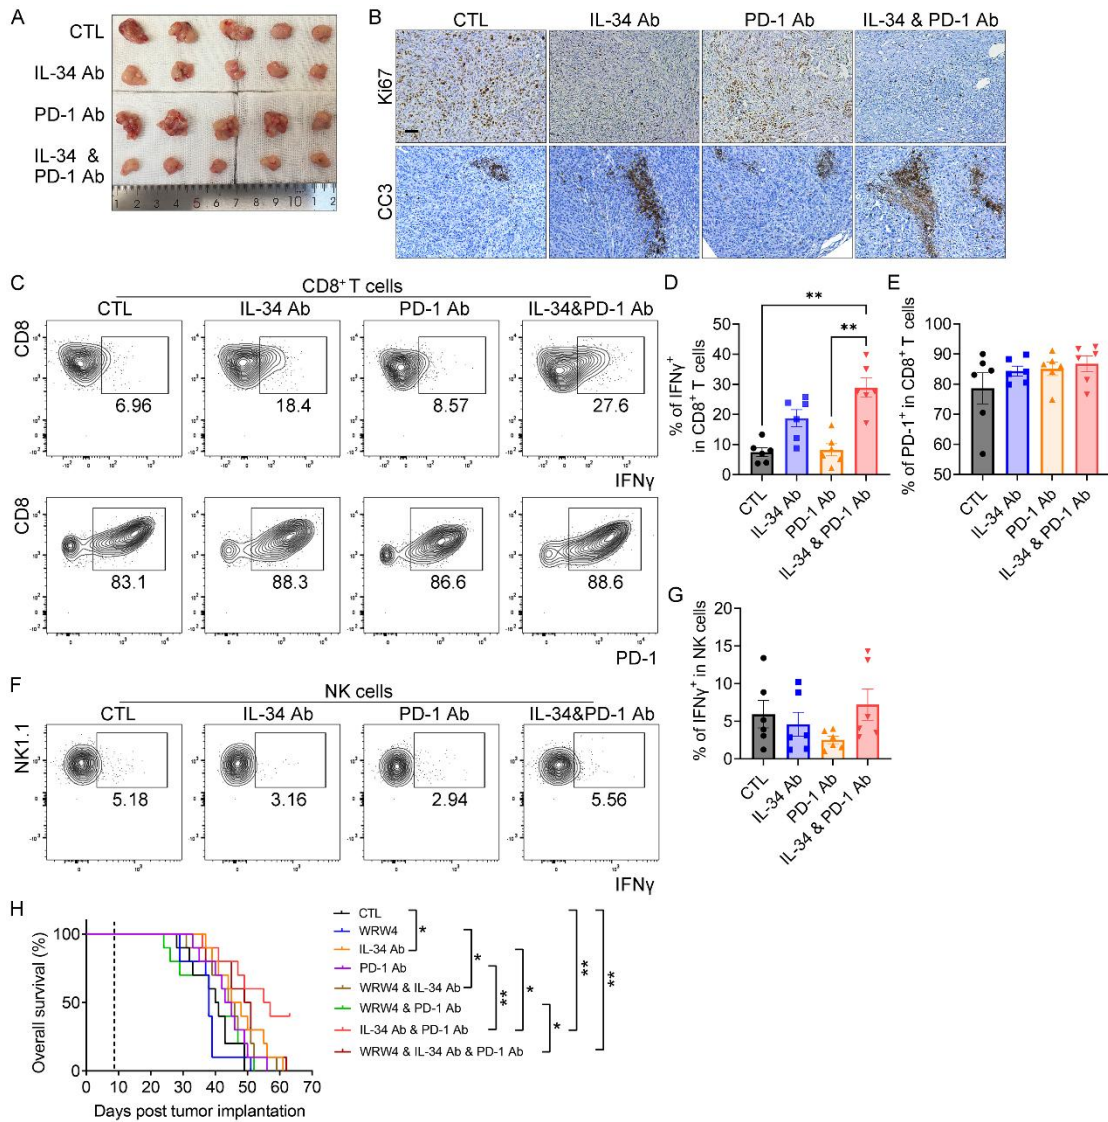

816

817 **Supplemental Figure 16. The combination therapy involving anti-IL-34 and anti-**

818 **PD-1 antibodies effectively halts tumor progression in PDAC by reinvigorating**

819 **CD8<sup>+</sup> T cells.** (A) Representative images of harvested tumor tissues from mice

820 subjected to the combination treatment, as outlined in **Figure 8A**. (B)

821 Immunohistochemical microscopy images revealing Ki67<sup>+</sup> cells and CC3<sup>+</sup> regions

822 within tumor tissues from mice after the combination treatment. (C) Flow cytometric

823 images showing the presence of IFN $\gamma$ <sup>+</sup>CD8<sup>+</sup> and PD-1<sup>+</sup>CD8<sup>+</sup> T cells in orthotopic

824 tumors following the combination therapy. (D and E) Quantification of (C) (n=6 per

825 group). (F) Images illustrating IFN $\gamma$  production in NK cells within the tumor tissues of

826 mice that underwent the combination treatment. **(G)** Quantification of **(F)** (n=6 per  
827 group). **(H)** Overall survival probabilities of mice following the combination therapy  
828 involving WRW4, anti-IL-34 antibodies, and/or anti-PD-1 antibodies (n=10 per group).  
829 The dashed line indicates the timepoint when the combination therapy commenced.  
830 \*p<0.05 and \*\*p<0.01 by Kruskal-Wallis test with Dunn's multiple comparison test **(D)**  
831 and by log-rank analysis **(H)**. Data represent mean ± SEM.  
832  
833

834 **Supplemental Tables**835 **Supplemental Table 1. A negative correlation exists between the abundance of**836 **CD138<sup>+</sup> TAMs and tumor differentiation in patients with PDAC.**

| Characteristic       | CD138 <sup>+</sup> TAM-low<br>(n=86) | CD138 <sup>+</sup> TAM-high<br>(n=66) | P-value |
|----------------------|--------------------------------------|---------------------------------------|---------|
| Age at diagnosis (y) |                                      |                                       |         |
| Median (range)       | 65.5 (35-90)                         | 65 (43-79)                            | 0.528   |
| Mean ± SD            | 65.6 ± 9.8                           | 64.3 ± 9.2                            |         |
| Sex                  |                                      |                                       |         |
| Male                 | 50 (58)                              | 37 (56)                               | 0.797   |
| Female               | 36 (42)                              | 29 (44)                               |         |
| pT Stage             |                                      |                                       |         |
| T1                   | 13 (15)                              | 15 (23)                               | 0.072   |
| T2                   | 36 (42)                              | 36 (54)                               |         |
| T3                   | 33 (38)                              | 13 (20)                               |         |
| T4                   | 4 (5)                                | 2 (3)                                 |         |
| pN Stage             |                                      |                                       |         |
| N0                   | 37 (44)                              | 32 (48)                               | 0.544   |
| N1/N2                | 48 (56)                              | 34 (52)                               |         |
| pM Stage             |                                      |                                       |         |

|                |                  |                   |              |
|----------------|------------------|-------------------|--------------|
| M0             | 79 (92)          | 64 (97)           | 0.329        |
| M1             | 7 (8)            | 2 (3)             |              |
| Pathology      |                  |                   |              |
| Stage I        | 19 (22)          | 25 (38)           | 0.053        |
| Stage II       | 55 (64)          | 33 (50)           |              |
| Stage III      | 5 (6)            | 6 (9)             |              |
| Stage IV       | 7 (8)            | 2 (3)             |              |
| CA19-9 (U/ml)  |                  |                   |              |
| Median (range) | 377.5 (2-12000)  | 508.8 (6.2-12000) | 0.47         |
| Mean ± SD      | 2169.8 ± 3768.6  | 2161.5 ± 3544.9   |              |
| CA125 (U/ml)   |                  |                   |              |
| Median (range) | 21.0 (4.6-266.6) | 18.4 (4.8-538.1)  | 0.187        |
| Mean ± SD      | 36.7 ± 42.2      | 34.4±69.6         |              |
| CEA (ng/ml)    |                  |                   |              |
| Median (range) | 3.8 (0.9-51.2)   | 3.1 (0.7-258.5)   | <b>0.015</b> |
| Mean ± SD      | 7.7 ± 8.8        | 8.7 ± 32.5        |              |
| Tumor location |                  |                   |              |
| Head/Neck      | 62 (74)          | 50 (76)           | 0.88         |
| Body/tail      | 22 (26)          | 16 (24)           |              |

| Primary tumor size (cm) |               |               |              |
|-------------------------|---------------|---------------|--------------|
| Median (range)          | 3.5 (1.0-7.0) | 2.8 (1.0-7.0) | 0.066        |
| Mean ± SD               | 3.5 ± 1.3     | 3.1 ± 1.3     |              |
| Perineural invasion     |               |               |              |
| Yes                     | 55 (64)       | 50 (77)       | 0.086        |
| No                      | 31 (36)       | 15 (23)       |              |
| Blood vessel invasion   |               |               |              |
| Yes                     | 38 (44)       | 33 (51)       | 0.422        |
| No                      | 48 (56)       | 32 (49)       |              |
| Tumor differentiation   |               |               |              |
| Low                     | 28 (34)       | 18 (29)       | <b>0.046</b> |
| Med                     | 38 (46)       | 40 (63)       |              |
| High                    | 17 (20)       | 5 (8)         |              |

837 CEA, carcinoembryonic antigen.

838

839 **Supplemental Data Files**

840 Supplemental Data file 1. Patient information for Cohort 3.

841 Supplemental Data file 2. Marker genes of clusters of F4/80<sup>+</sup> cells isolated from  
842 orthotopic tumors.

843 Supplemental Data file 3. Marker genes of main clusters of live cells derived from the  
844 pancreas of both healthy and acute pancreatitis mice.

845 Supplemental Data file 4. Signaling pathways enriched in *Sdc1*<sup>+</sup> TAMs identified by  
846 GESA.

847 Supplemental Data file 5. The DEGs and the KEGG enriched pathways associated with  
848 CD138<sup>+</sup> macrophages derived from orthotopic tumors, in comparison to previously  
849 reported gene sets and pathways.

850 Supplemental Data file 6. Common genes identified between the DEGs of the *Sdc1*<sup>+</sup>  
851 (MM1) scRNA-seq cluster and CD138<sup>+</sup> macrophages isolated from orthotopic tumors.

852 Supplemental Data file 7. Marker genes of main clusters of live cells isolated from  
853 peripheral blood and tumor tissues of mice with KPC orthotopic tumors.

854 Supplemental Data file 8. Synergized genes up-regulated by IL-34 and PGE<sub>2</sub>.

855 Supplemental Data file 9. Marker genes of clusters of monocytes/macrophages derived  
856 from peripheral blood and tumor tissues of orthotopic KPC mice.

857 Supplemental Data file 10. Driver genes of the monocyte-to-*Sdc1*<sup>+</sup> TAM transition.

858 Supplemental Data file 11. Signaling pathways enriched in *Sdc1*<sup>+</sup> TAMs based on  
859 KEGG enrichment analysis.

860 Supplemental Data file 12. Marker genes of CD8<sup>+</sup> T cell clusters, DEGs of CD8<sup>+</sup> T cells,

861 and GSEA of pathways enriched in CD8<sup>+</sup> T cells in orthotopic KPC mice following  
862 adoptive transfer.

863 Supplemental Data file 13. Marker genes of CD8<sup>+</sup> T cell clusters, DEGs of CD8<sup>+</sup> T cells,  
864 and GSEA of pathways enriched in CD8<sup>+</sup> T cells in control and Sdc1-cKO mice with  
865 orthotopic tumors.

866 Supplemental Data file 14. Marker genes of clusters of neutrophils derived from tumor  
867 tissues of orthotopic KPC mice.

868 Supplemental Data file 15. DEGs of Siglec-F<sup>+</sup> neutrophils compared to Siglec-F<sup>-</sup>  
869 neutrophils and signaling pathways enriched in Siglec-F<sup>+</sup> neutrophils as determined by  
870 KEGG enrichment analysis.
