# Supplementary material for: A CD138+ tumor-associated macrophage/Siglec-F+ neutrophil feed-forward loop promotes immune evasion in pancreatic cancer
Source: JCI journal article supplement (doi:10.1172/jci199516), 2026-03-12

Full unedited blot for Supplemental Figure 7J.

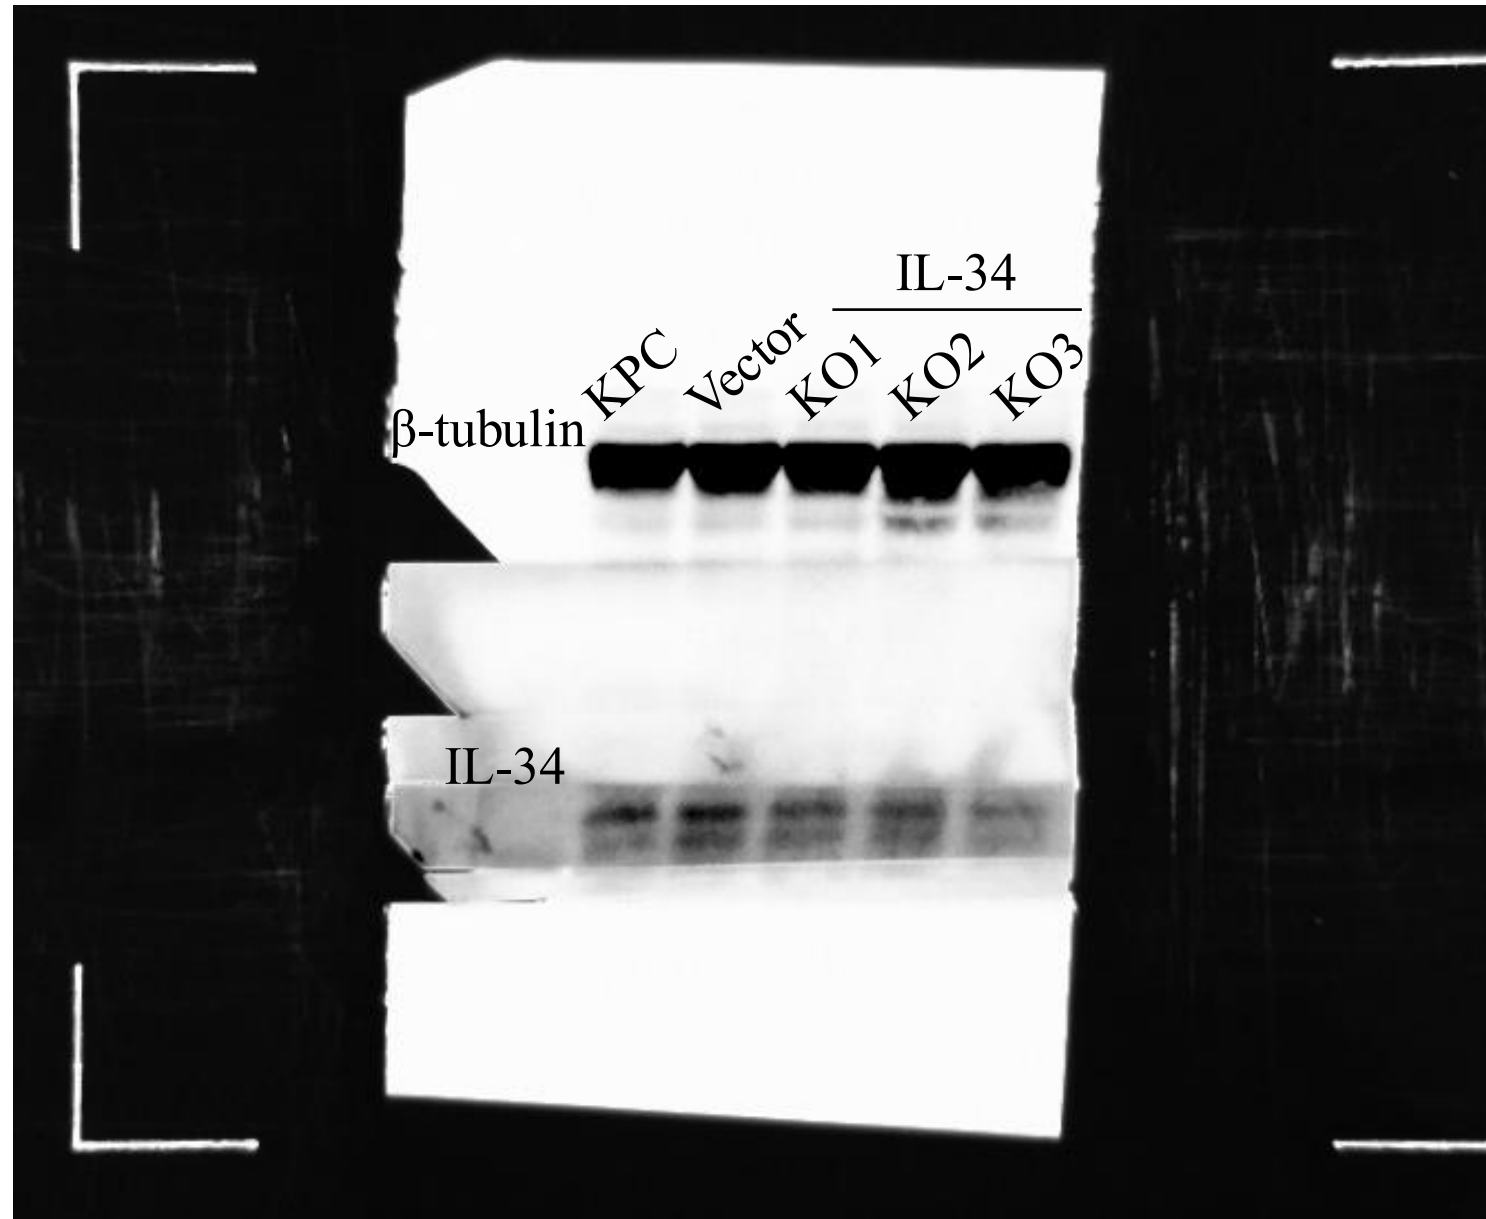

Full unedited blot for Supplemental Figure 7K.

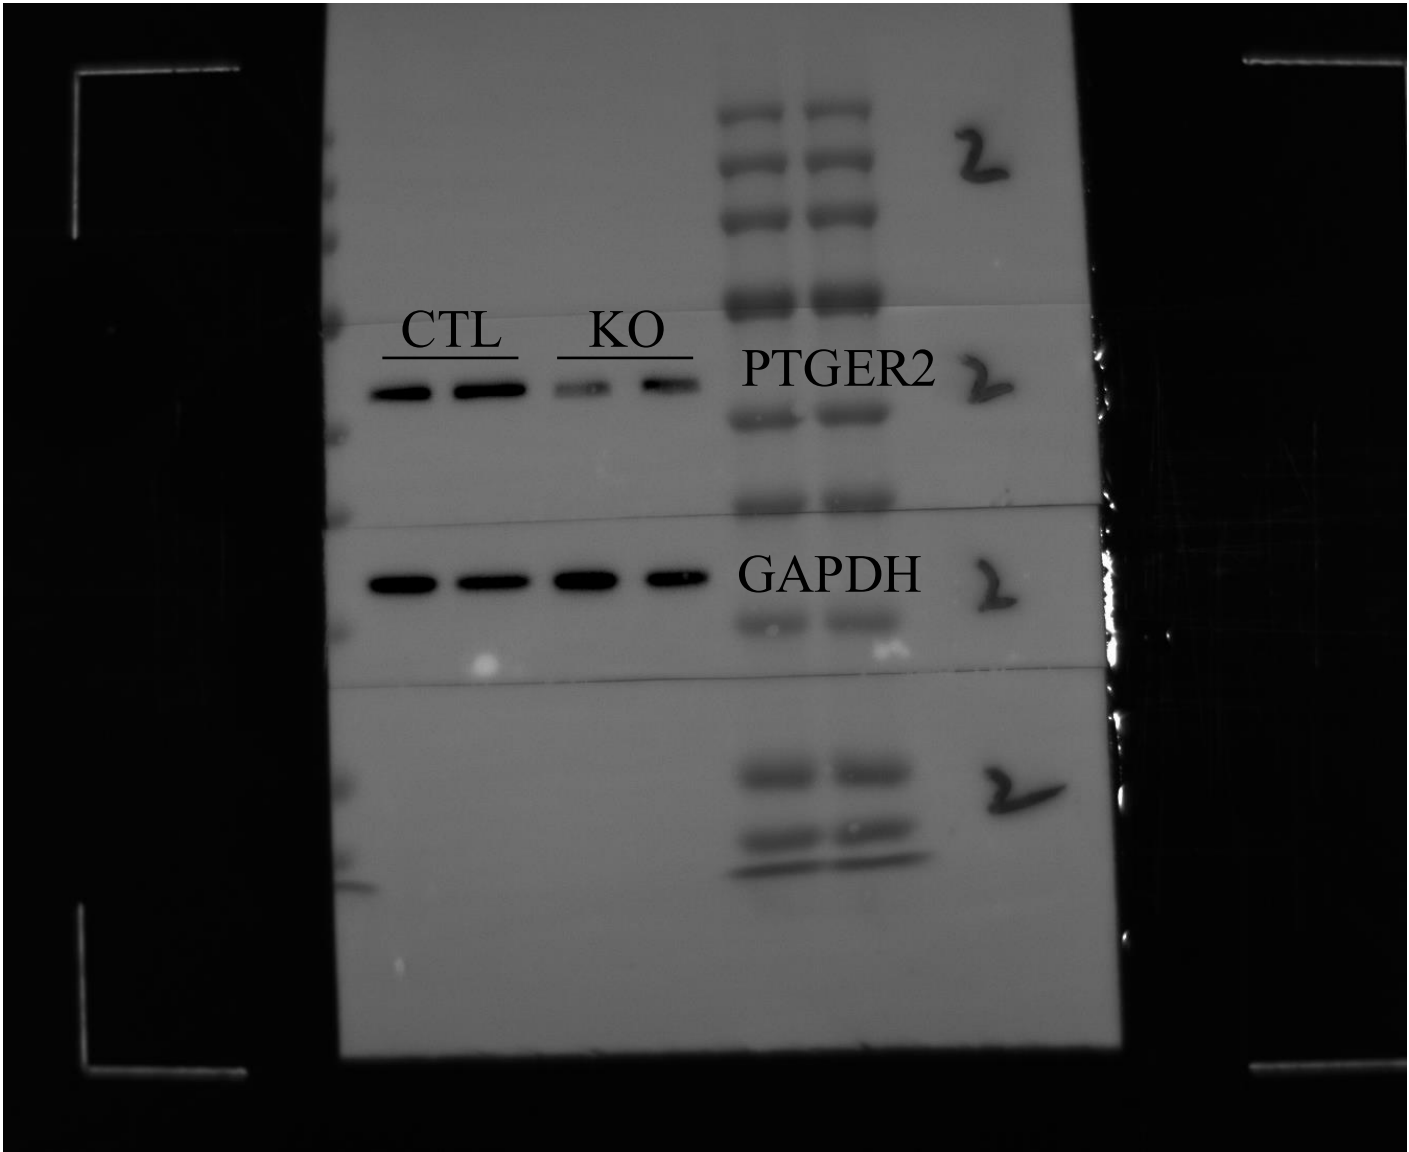

Supplement: sd2 [file 2]
